# Supplementary material for: A theoretical study on the methanol to propene mechanism catalyzed by a phosphorus-modified acidic FAU zeolite
Source: Royal Society of Chemistry journal article supplement (doi:10.1039/d2nj04863a), 2022-12-09
Supplement: d2nj04863a1.pdf [file d2nj04863a1.pdf]

# Supplementary Information

## A theoretical study on methanol to propene mechanism catalyzed by phosphorus modified acidic FAU zeolite

*Mengya Xia<sup>†</sup>, Qiaoxian Tong<sup>†</sup>, Huai Sun<sup>††</sup>, Yingxin Sun<sup>\*†</sup>, Sheng Han<sup>\*†</sup>, Qianggen Li<sup>\*†††</sup>*

<sup>†</sup>School of Chemical and Environmental Engineering, Shanghai Institute of  
Technology, Shanghai 201418, China

<sup>††</sup>School of Chemistry and Chemical Engineering, Shanghai Jiao Tong University,  
Shanghai 201418, China

<sup>†††</sup>College of Chemistry and Material Science, Sichuan Normal University, Chengdu  
610068, China

\*Corresponding authors: Yingxin Sun, Sheng Han, Qianggen Li

Tel: +86-21-6087-7214, +86-28-8476-0802

E-mail: sunyingxin0312@sit.edu.cn, hansheng654321@sina.com, [liqgen@sicnu.edu.cn](mailto:liqgen@sicnu.edu.cn)

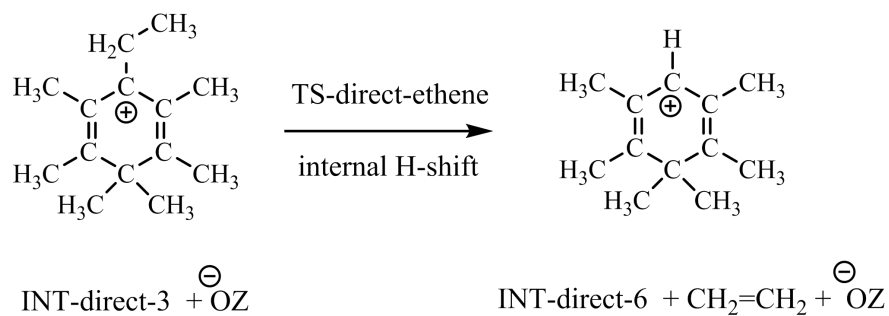

**Scheme S1** The proposed pathway for the formation of ethene in phosphorus modified H-FAU zeolite.

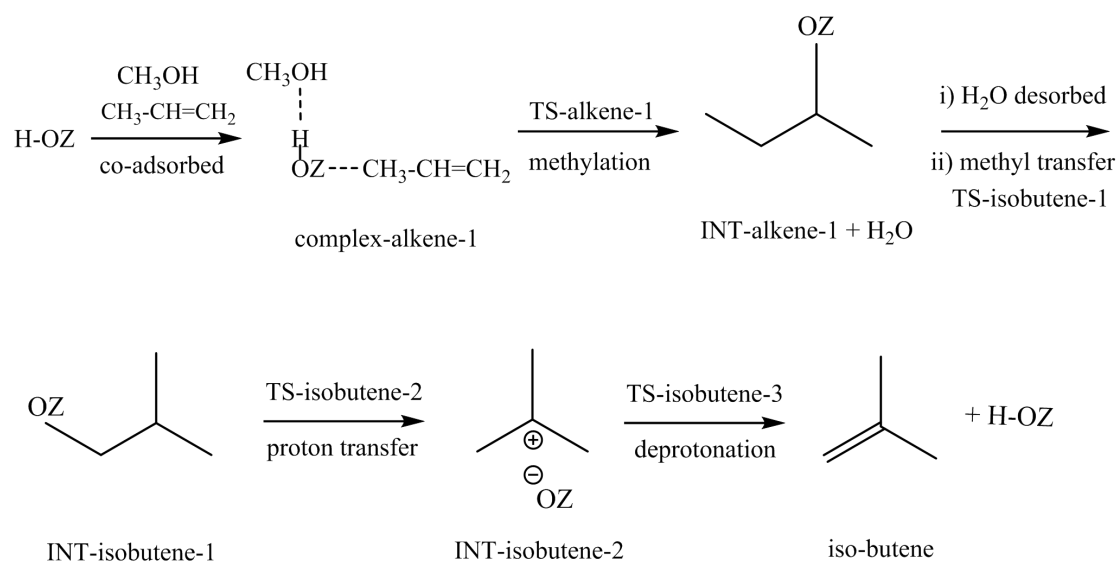

**Scheme S2** The proposed pathway for the formation of iso-butene in phosphorus modified H-FAU zeolite.

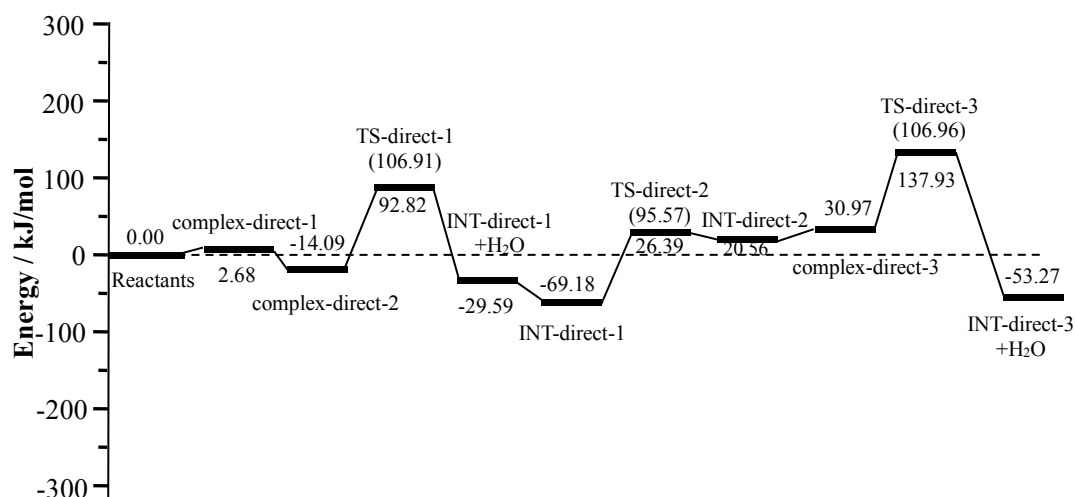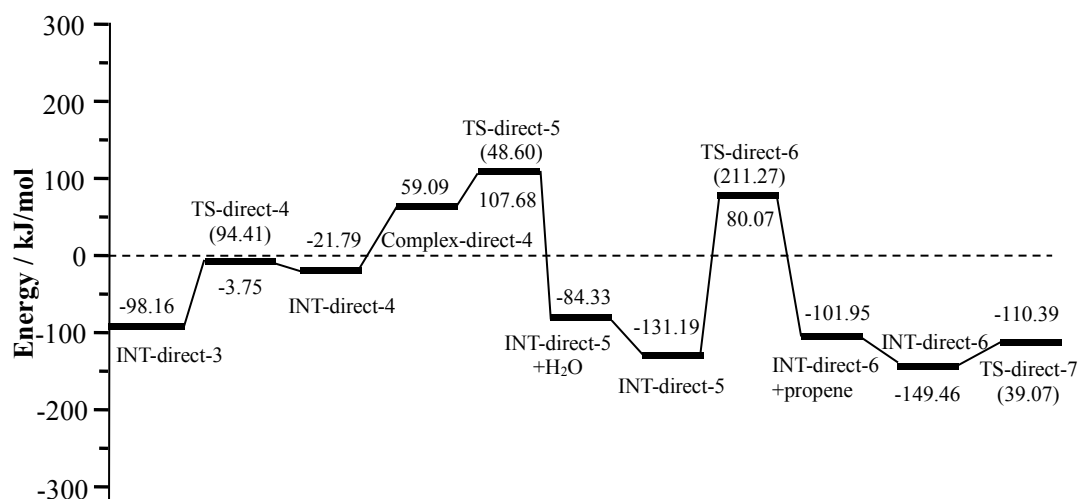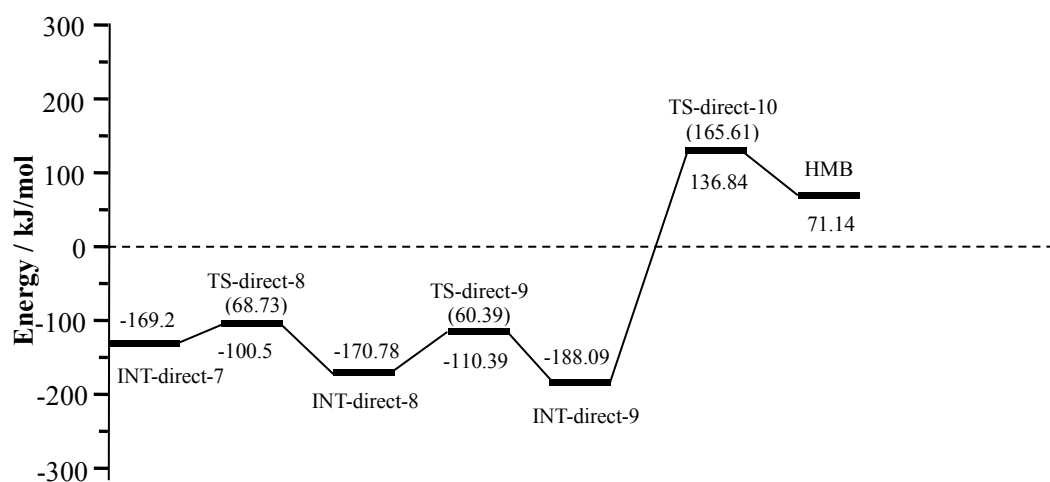

**Fig. S1** Free energy profiles calculated for the direct internal H-shift pathway illustrated in Scheme 1 over phosphorus modified FAU zeolite at 673.15 K. The zeolite framework, the methanol and H<sub>2</sub>O in the gaseous phase at infinite separation are taken as the reference state. For transition states, the activation barriers are given in parentheses.

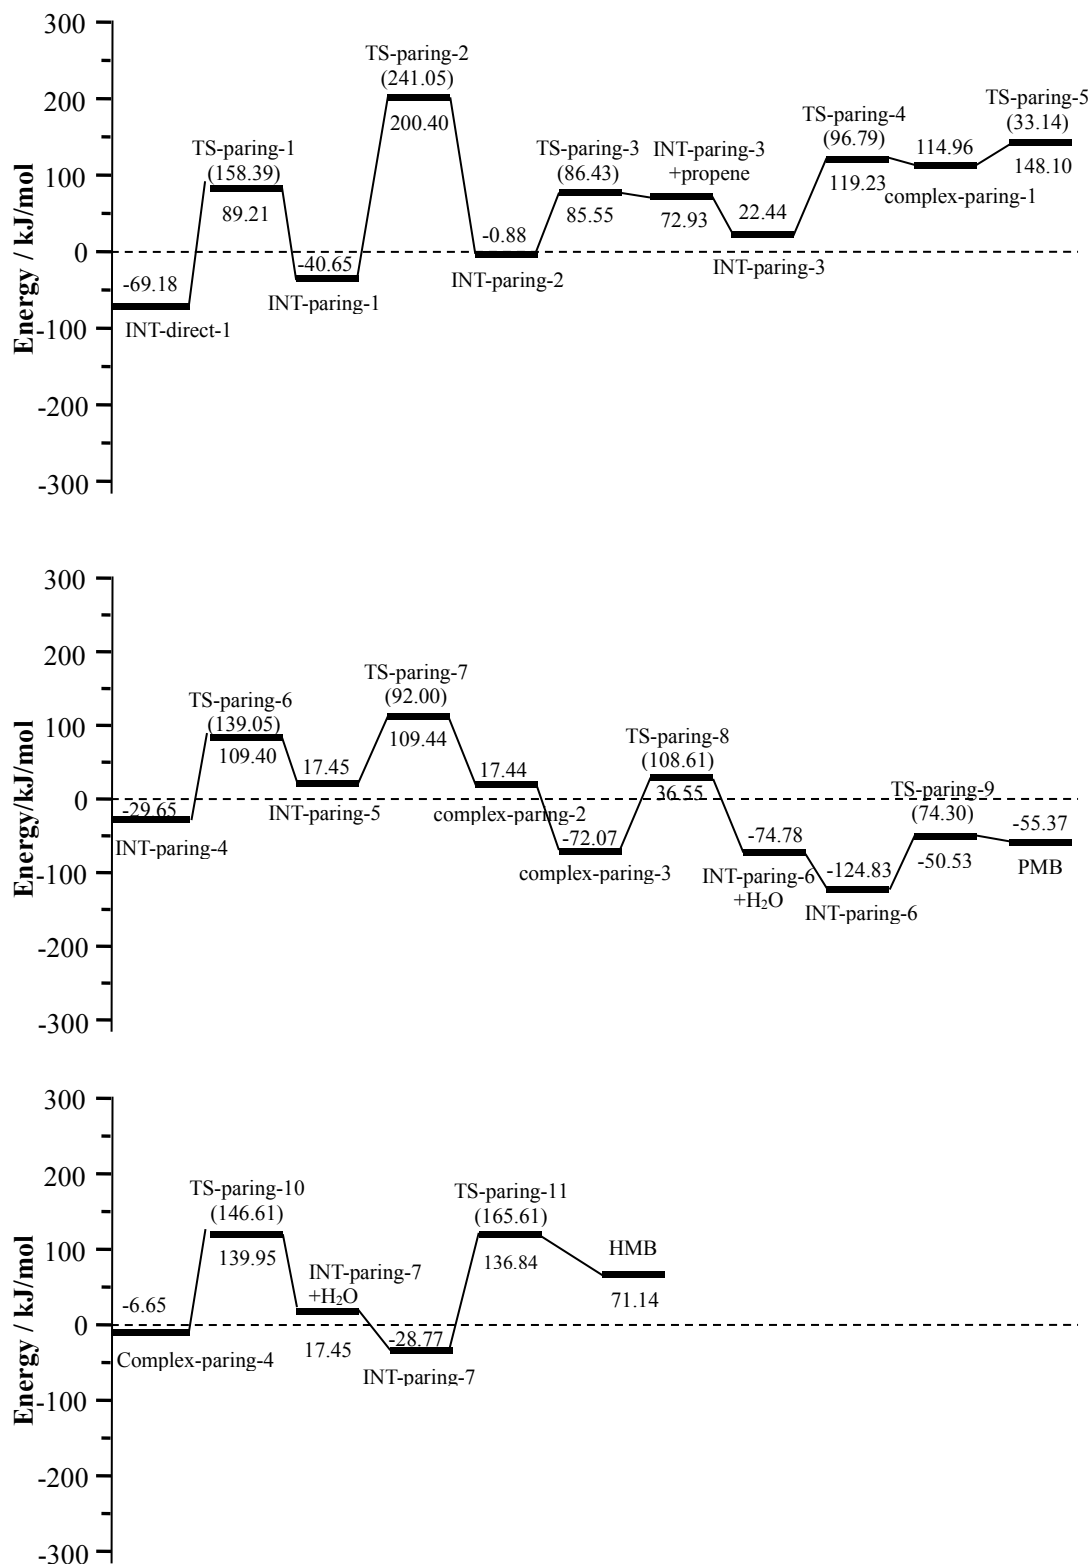

**Fig. S2** Free energy profiles calculated for the paring pathway illustrated in Scheme 2 over phosphorus modified FAU zeolite at 673.15 K. The zeolite framework, methanol and H<sub>2</sub>O in the gaseous phase at infinite separation are taken as the reference state. For transition states, the activation barriers are given in parentheses. For simplicity, the same steps (from reactants to INT-direct-1 in Scheme 1) are omitted.

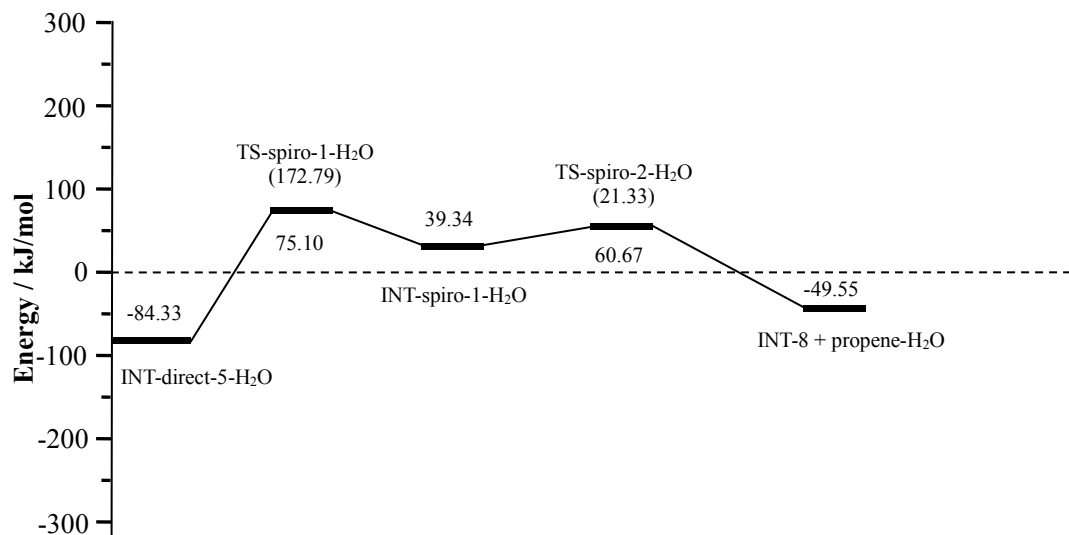

(a)

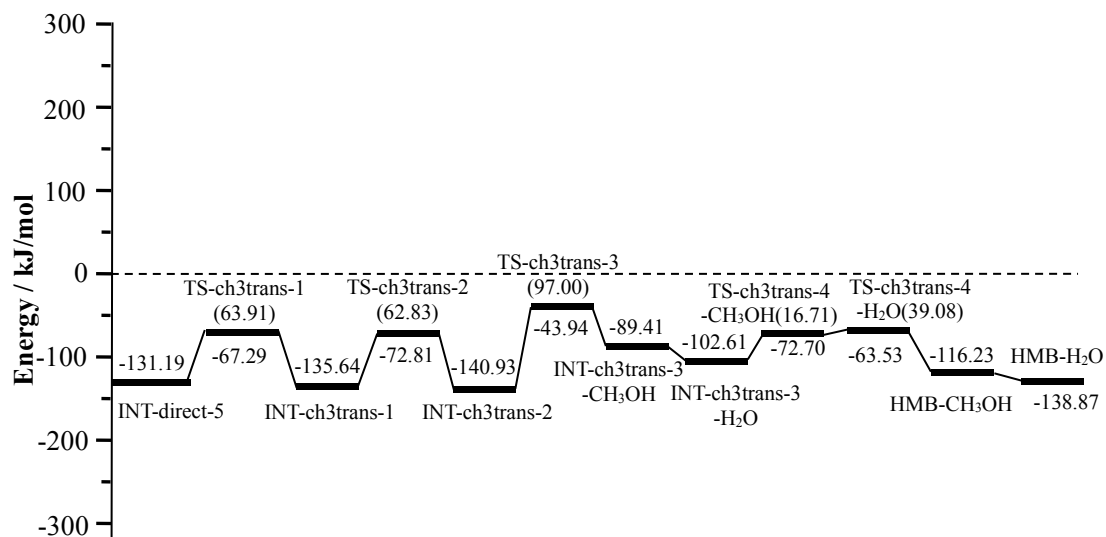

(b)

**Fig. S3** Free energy profiles calculated for the indirect spiro (a) and methyl-transfer (b) pathways illustrated in Scheme 3 over phosphorus modified FAU zeolite at 673.15 K. The zeolite framework, methanol and H<sub>2</sub>O in the gaseous phase at infinite separation are taken as the reference state. For transition states, the activation barriers are given in parentheses. For simplicity, the same steps (from reactants to INT-direct-5 in Scheme 1) are omitted.

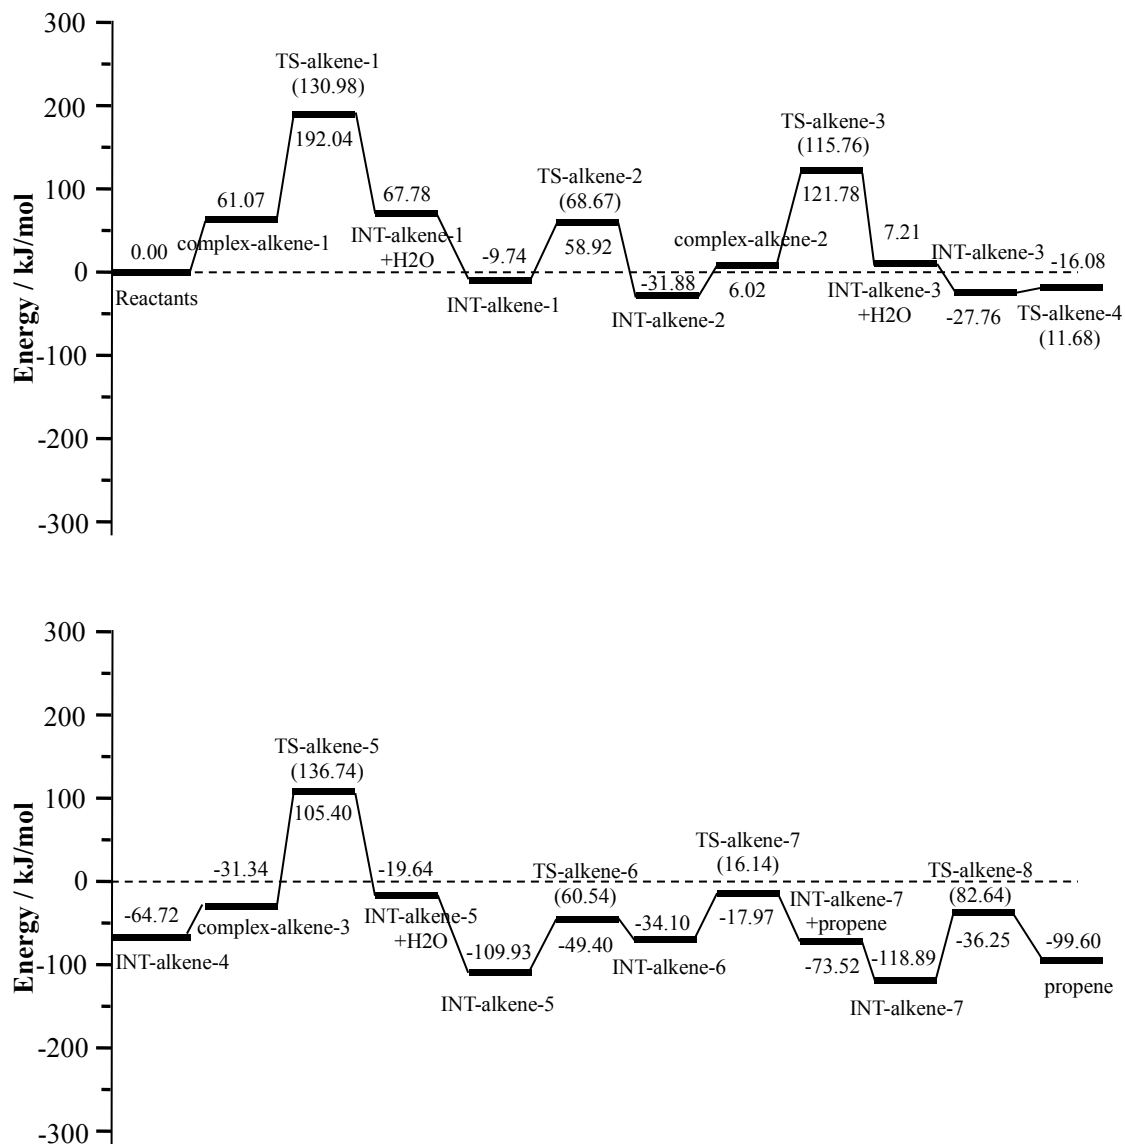

**Fig. S4** Free energy profiles calculated for the formation of propene via the alkene cycle illustrated in Scheme 4 over phosphorus modified FAU zeolite at 673.15 K. The zeolite framework, methanol, propene, and H<sub>2</sub>O in the gaseous phase at infinite separation are taken as the reference state. For transition states, the activation barriers are given in parentheses.

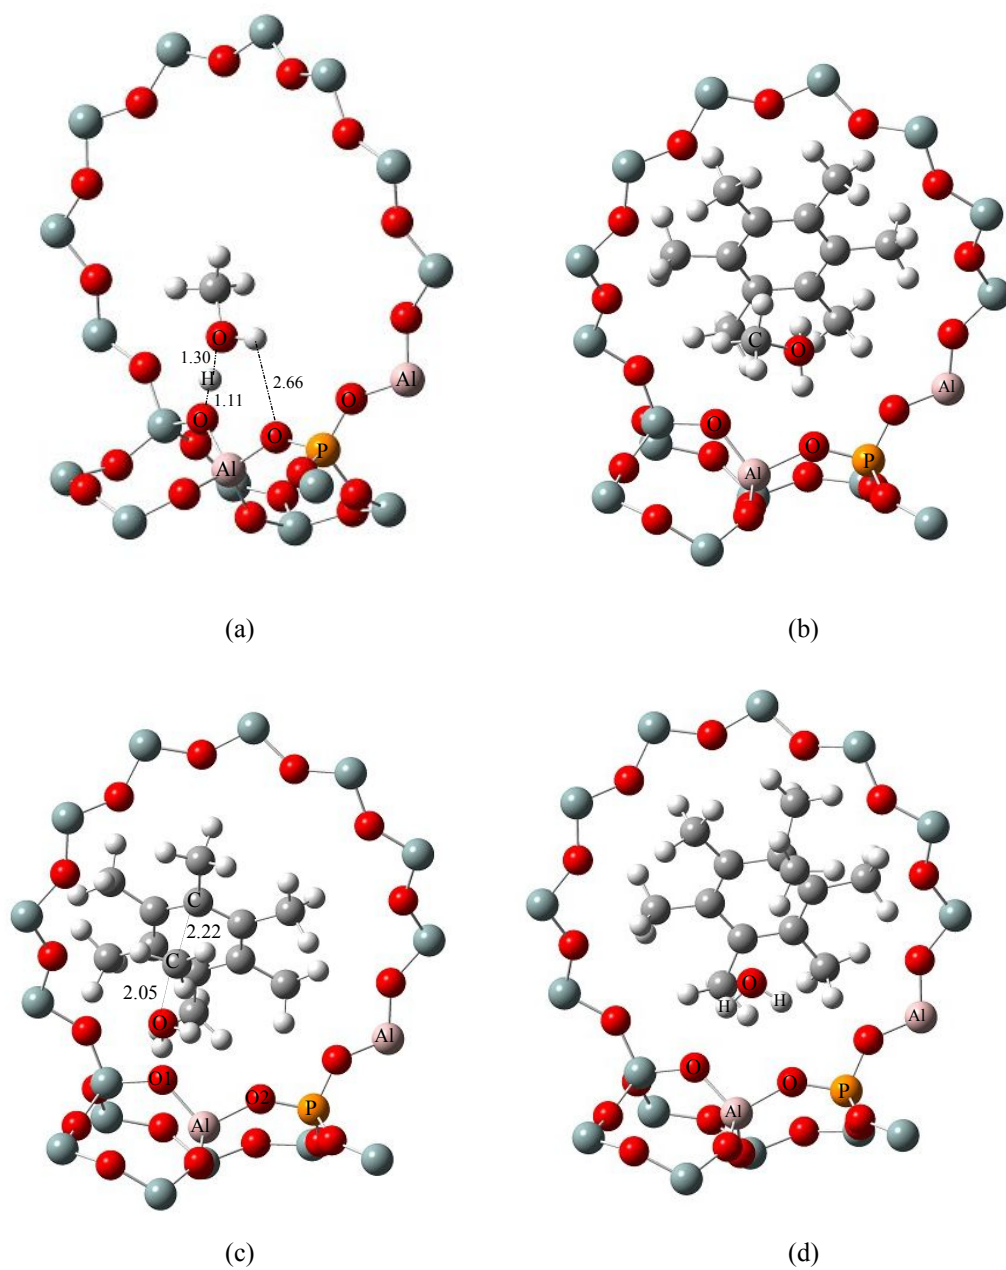

**Fig. S5** Optimized structures of (a) complex-direct-1, (b) complex-direct-2, (c) TS-direct-1, and (d) INT-direct-1.

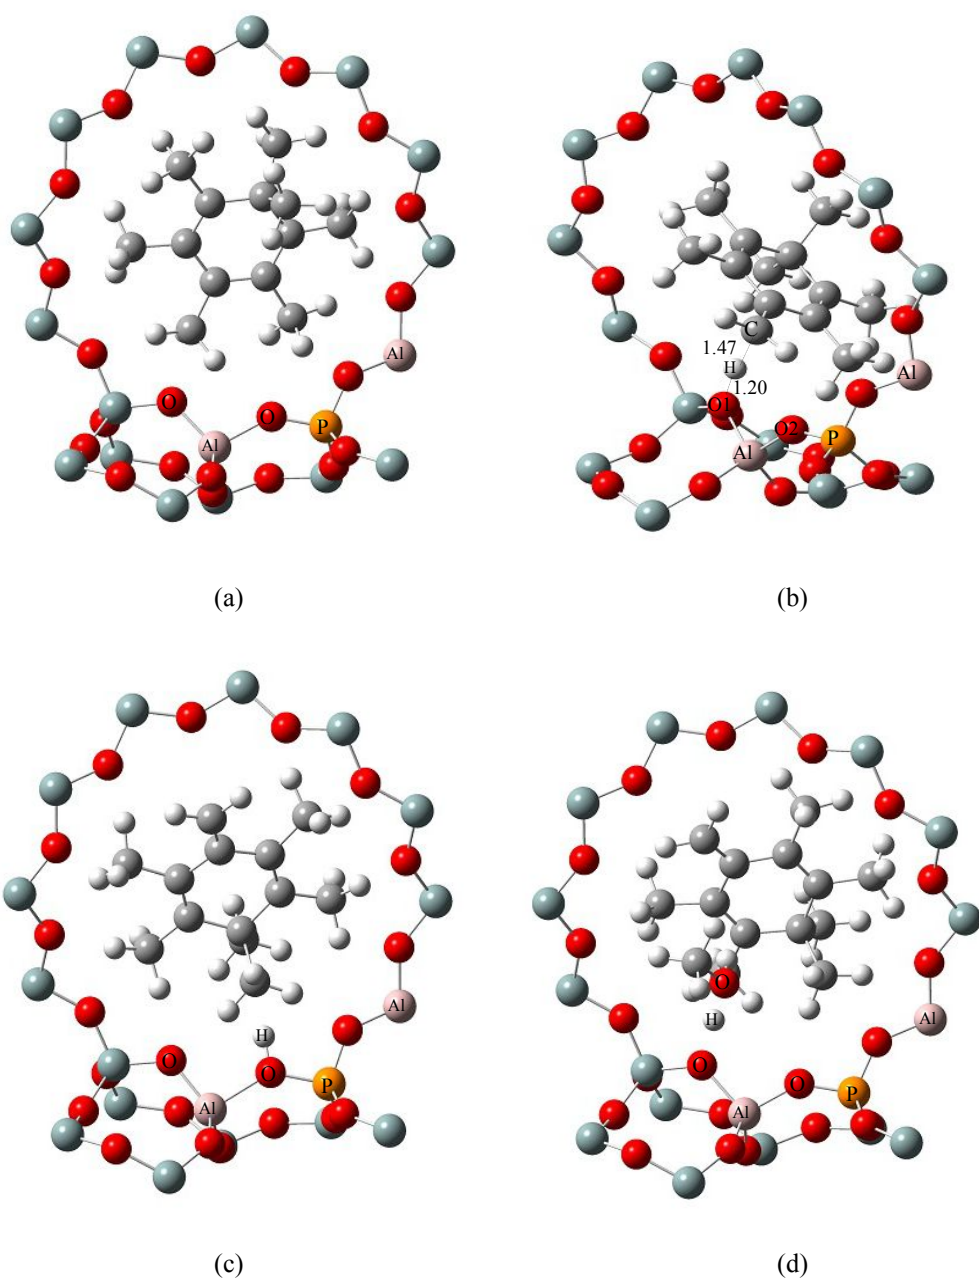

**Fig. S6** Optimized structures of (a) INT-direct-1-noH<sub>2</sub>O, (b) TS-direct-2, (c) INT-direct-2, and (d) complex-direct-3.



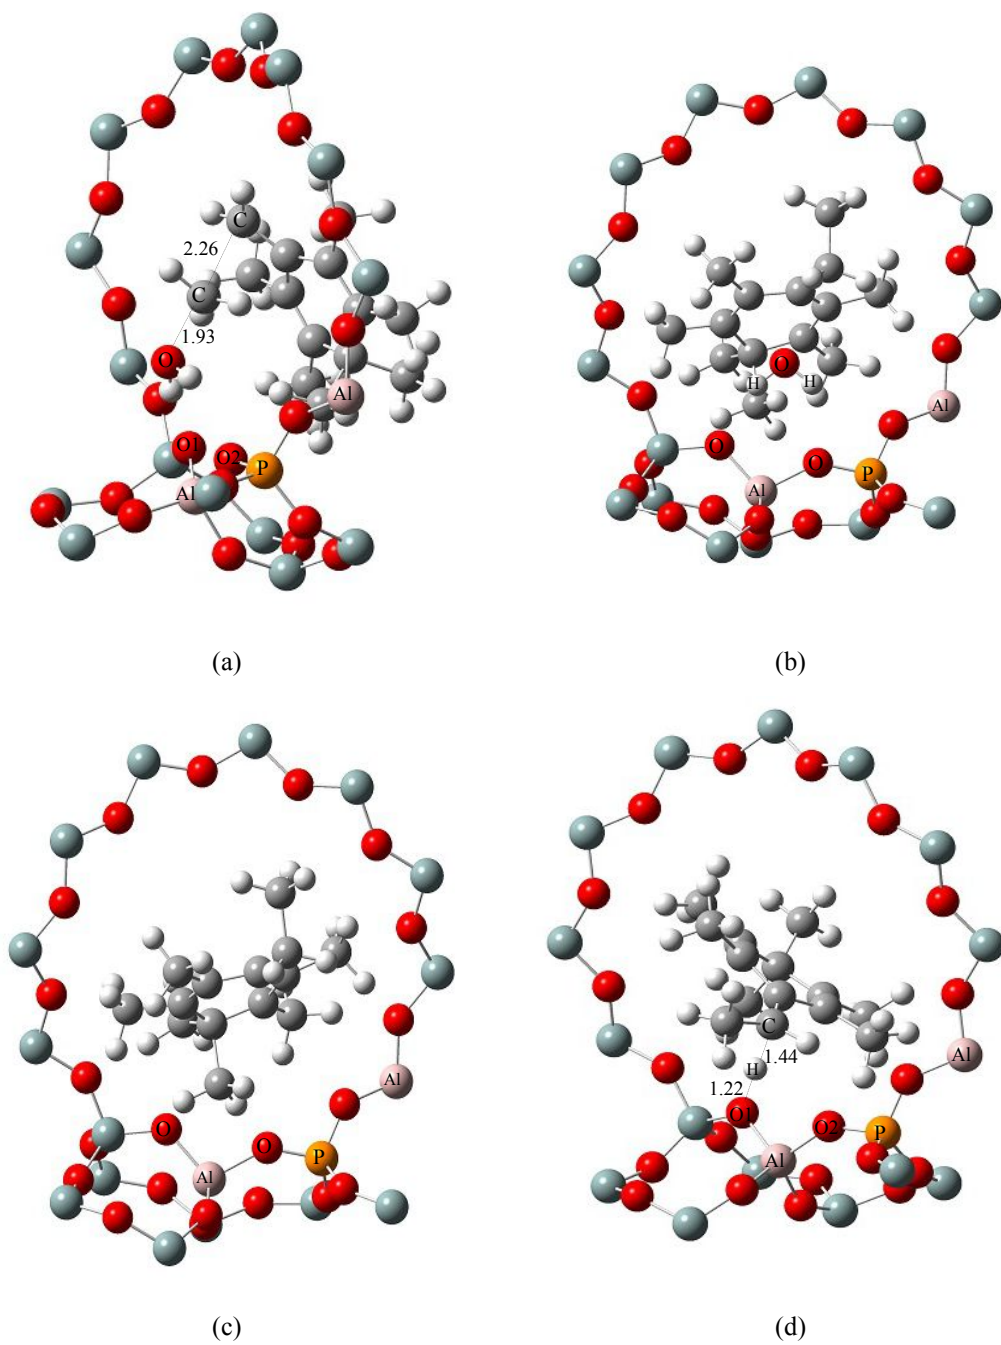

**Fig. S7** Optimized structures of (a) TS-direct-3, (b) INT-direct-3, (c) INT-direct-3-noH<sub>2</sub>O, and (d) TS-direct-4.

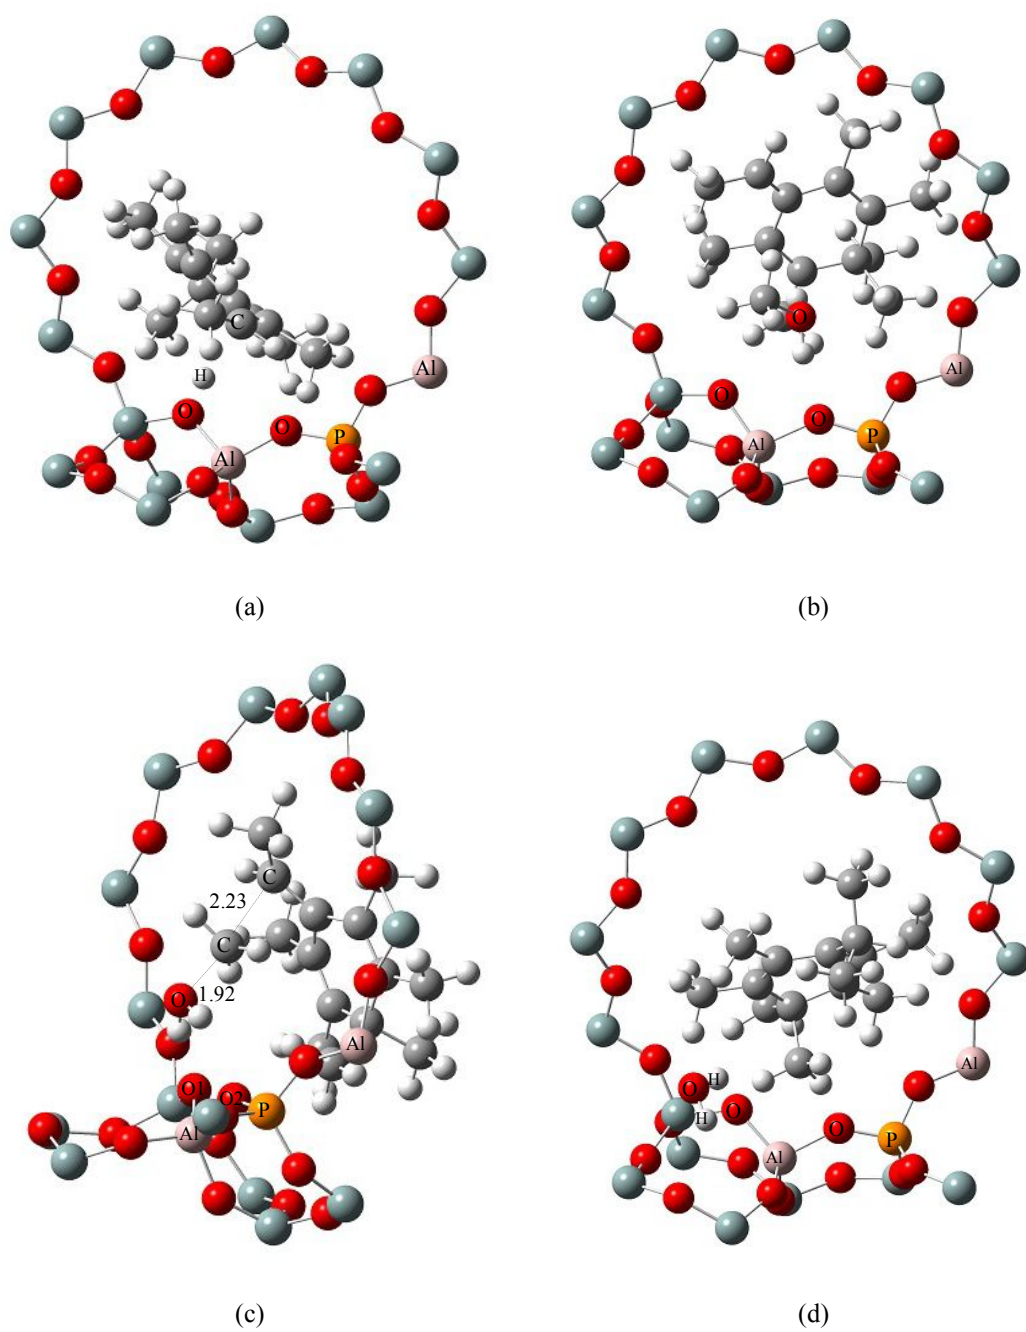

**Fig. S8** Optimized structures of (a) INT-direct-4, (b) complex-direct-4, (c) TS-direct-5, and (d) INT-direct-5.

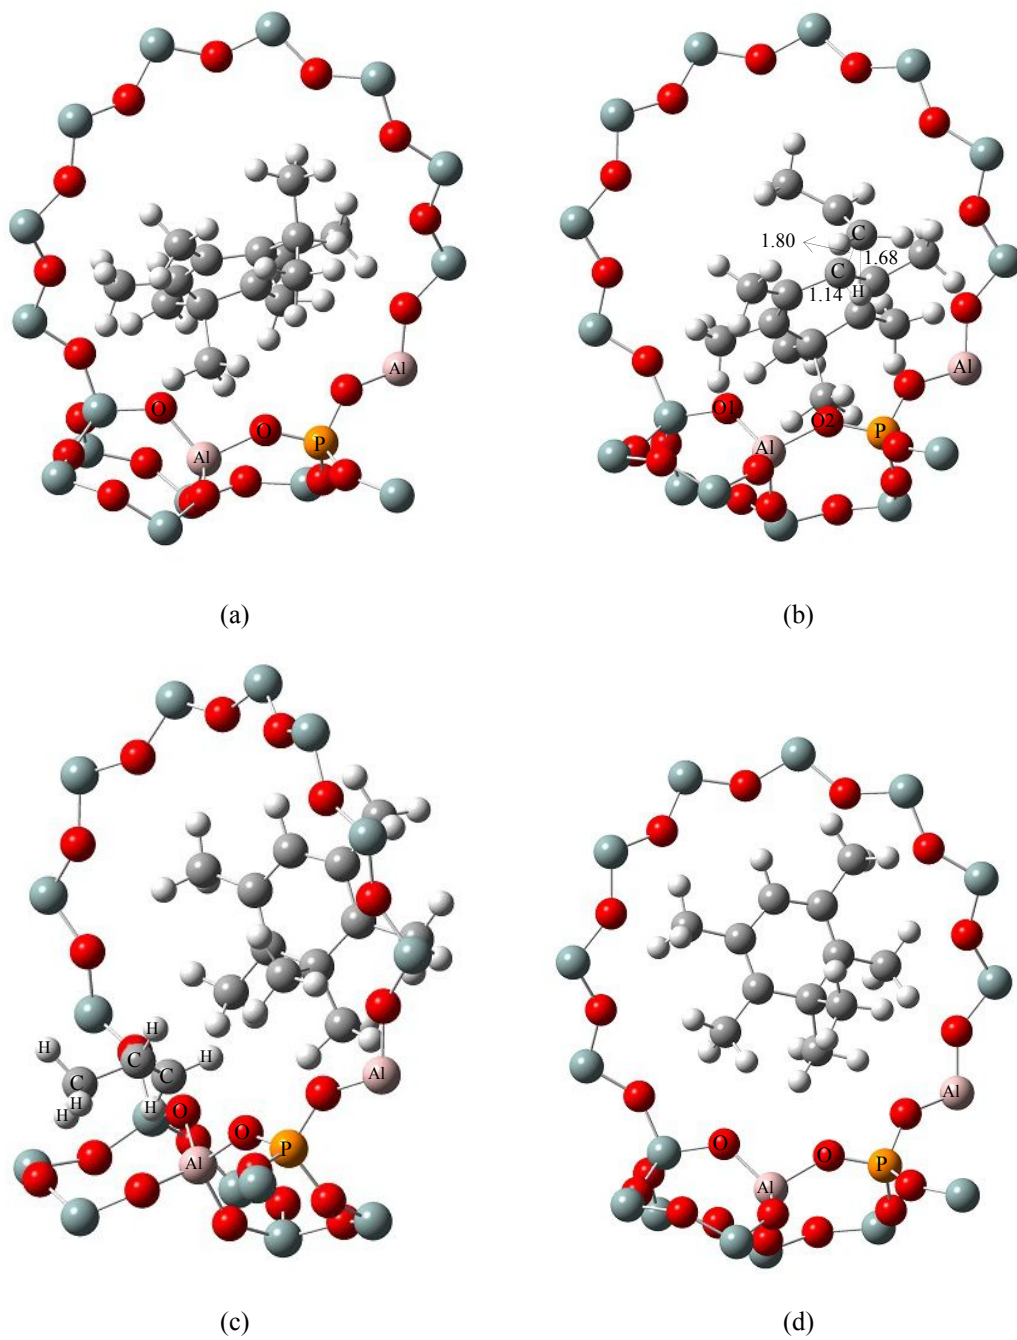

**Fig. S9** Optimized structures of (a) INT-direct-5-noH<sub>2</sub>O, (b) TS-direct-6, (c) INT-direct-6, and (d) INT-direct-6-nopropene.

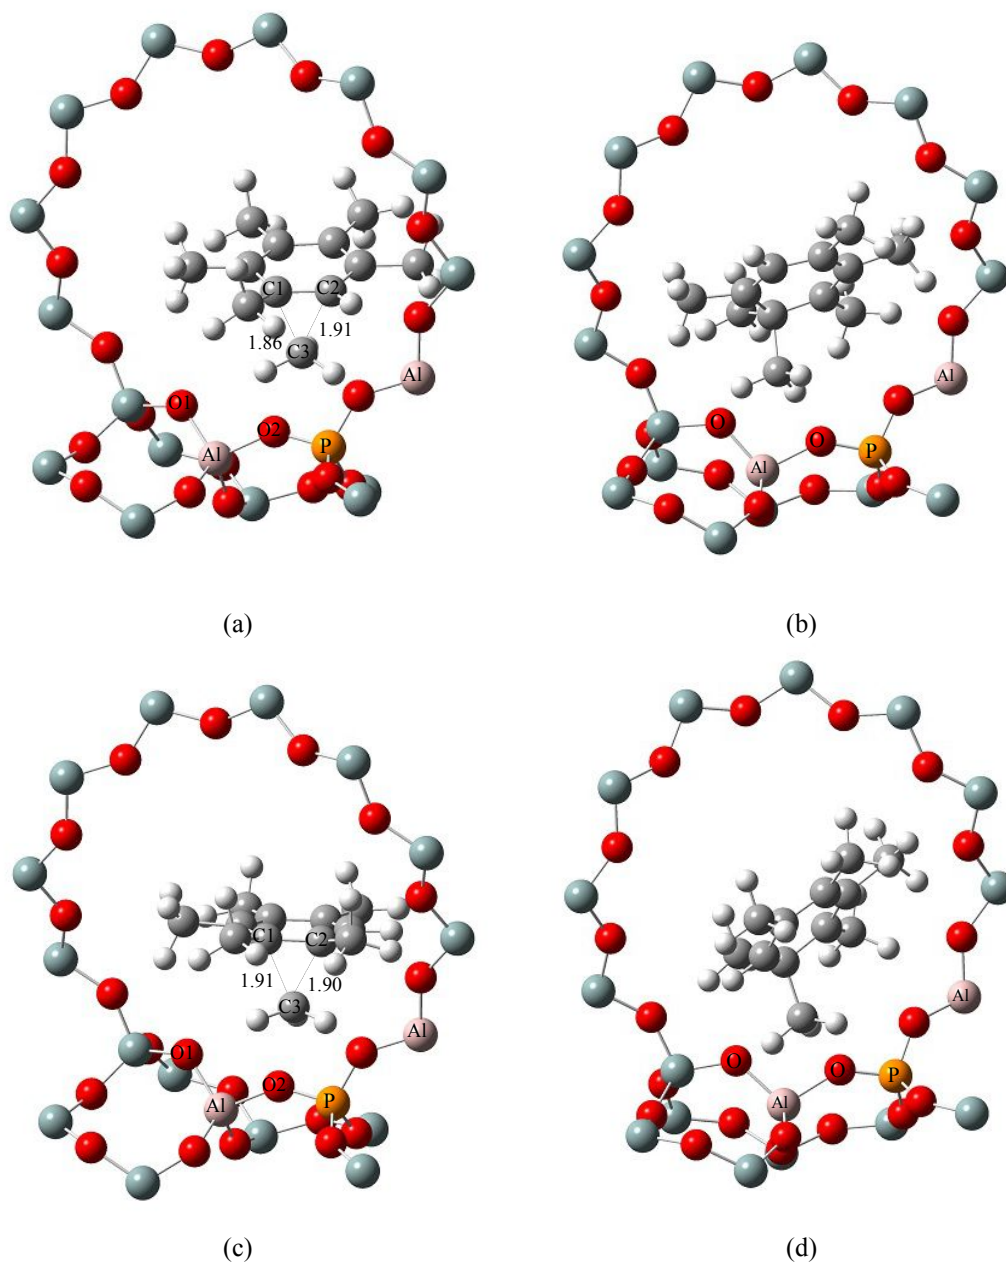

**Fig. S10** Optimized structures of (a) TS-direct-7, (b) INT-direct-7, (c) TS-direct-8, and (d) INT-direct-8.

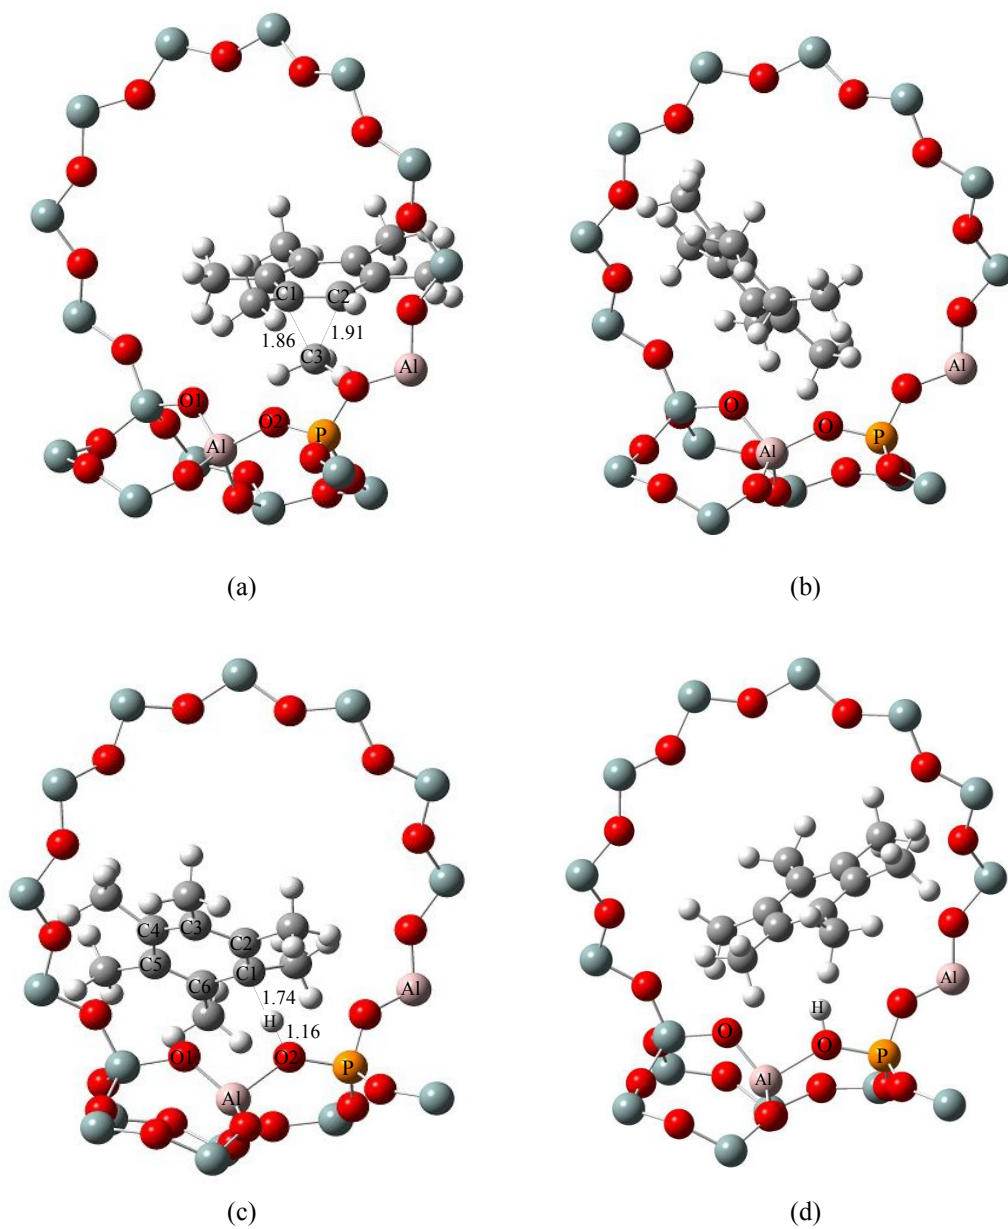

**Fig. S11** Optimized structures of (a) TS-direct-9, (b) INT-direct-9, (c) TS-direct-10, and (d) HMB.

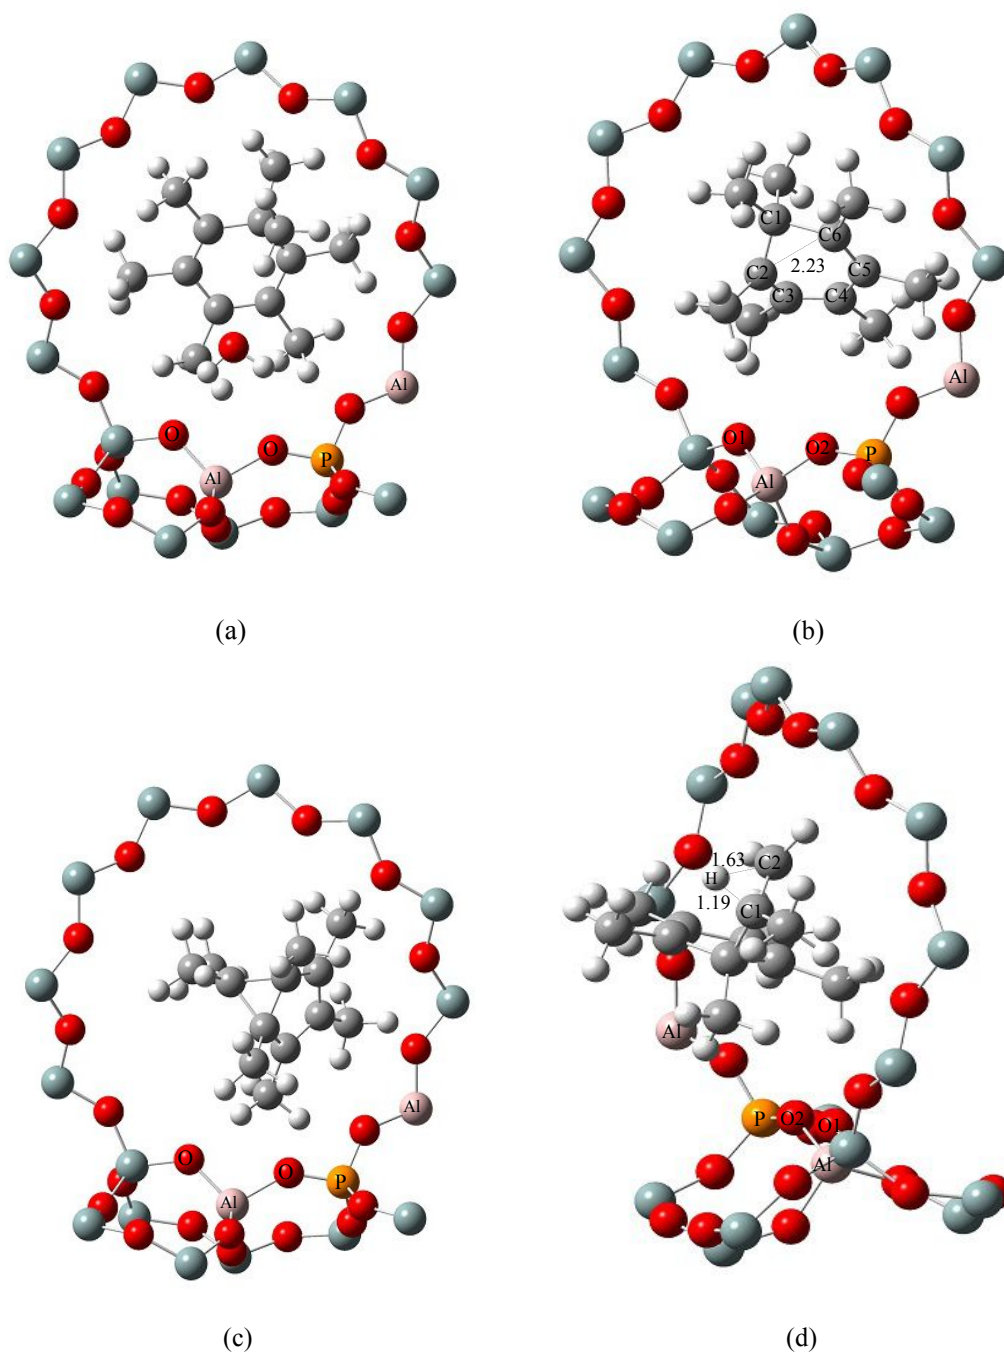

**Fig. S12** Optimized structures of (a) INT-direct-1, (b) TS-paring-1, (c) INT-paring-1, and (d) TS-paring-2.

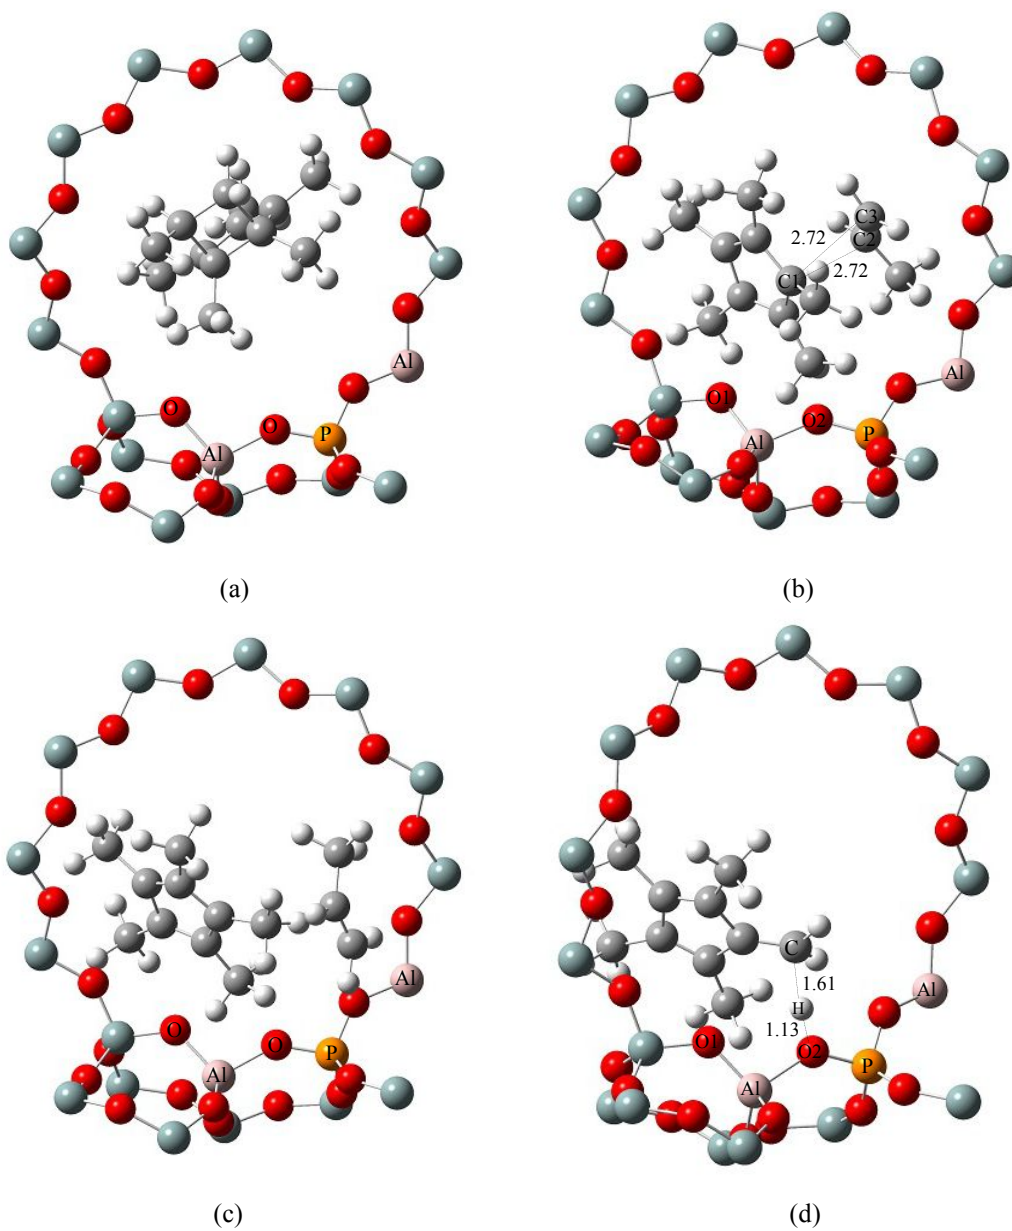

**Fig. S13** Optimized structures of (a) INT-paring-2, (b) TS-paring-3, (c) INT-paring-3, and (d) TS-paring-4.

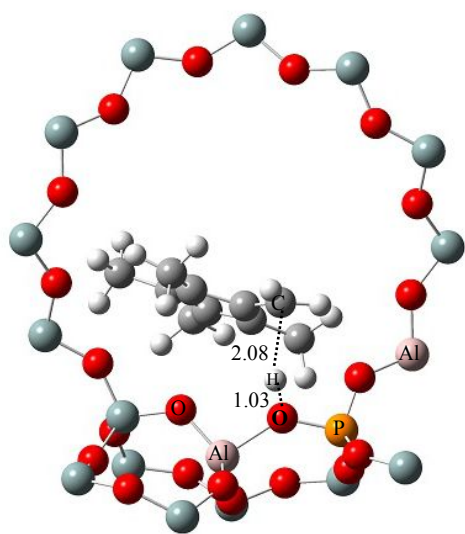

(a)

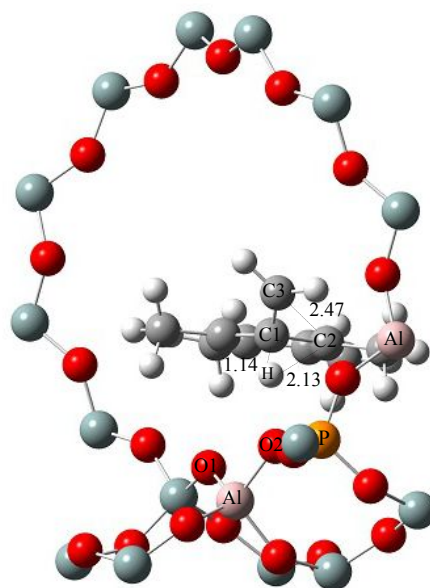

(b)

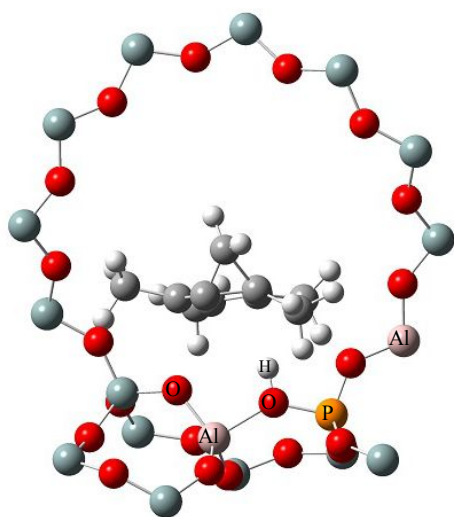

(c)

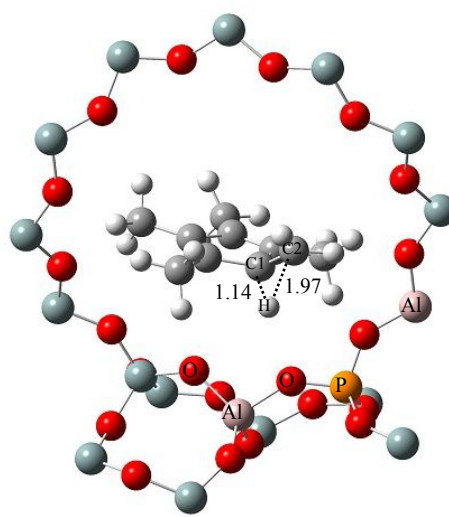

(d)

**Fig. S14** Optimized structures of (a) complex-paring-1, (b) TS-paring-5, (c) INT-paring-4, and (d) TS-paring-6.



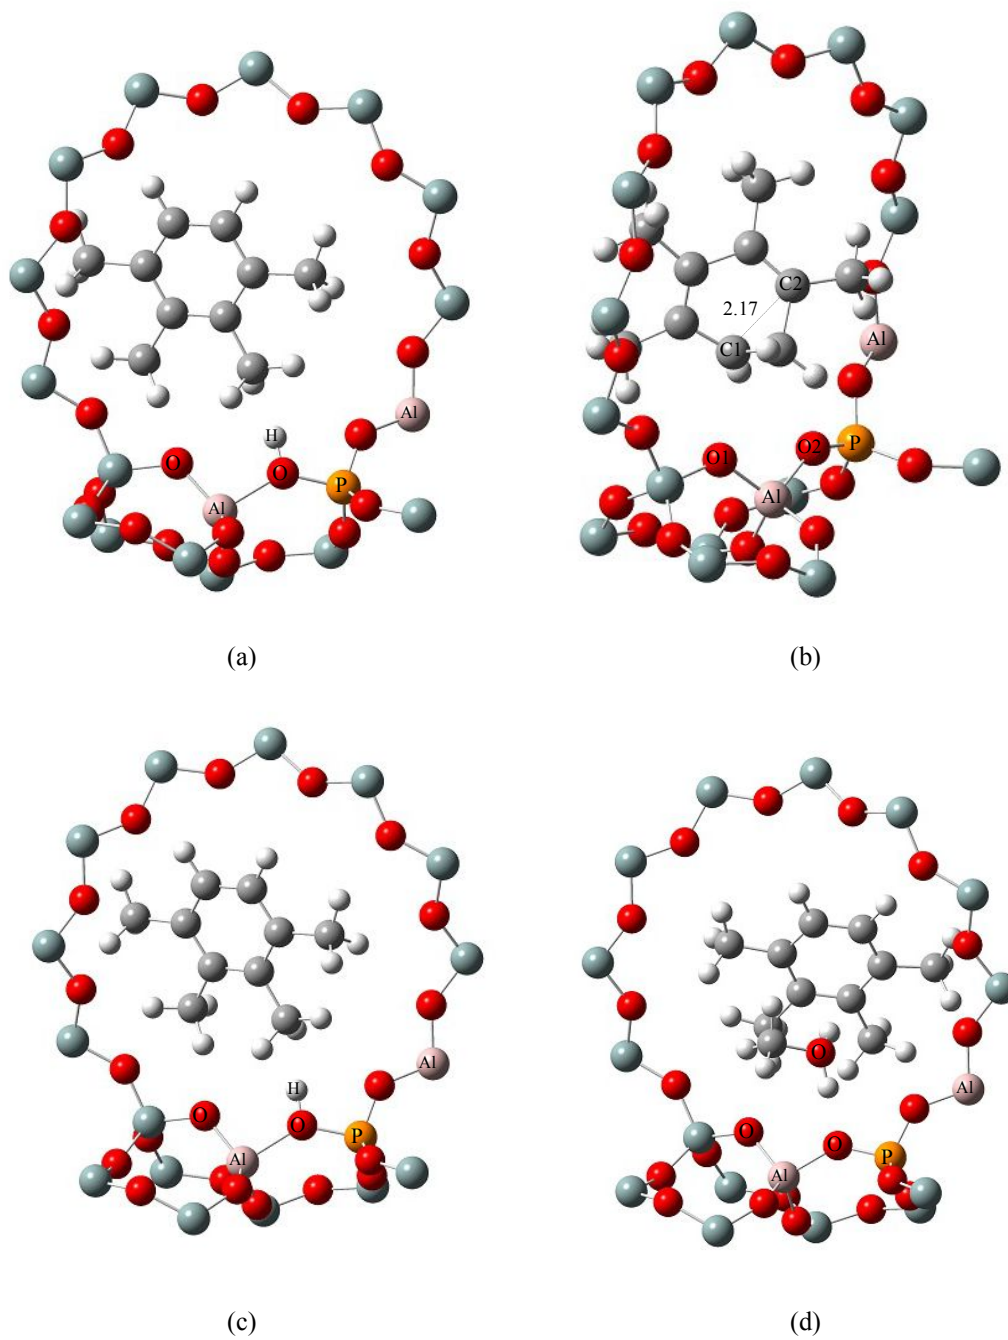

**Fig. S15** Optimized structures of (a) INT-paring-5, (b) TS-paring-7, (c) complex-paring-2, and (d) complex-paring-3.

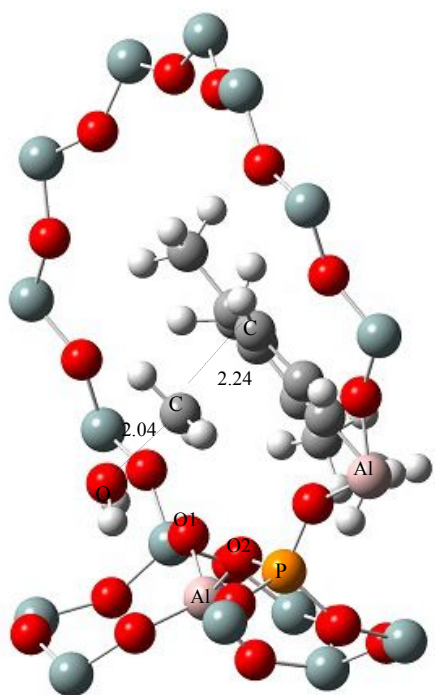

(a)

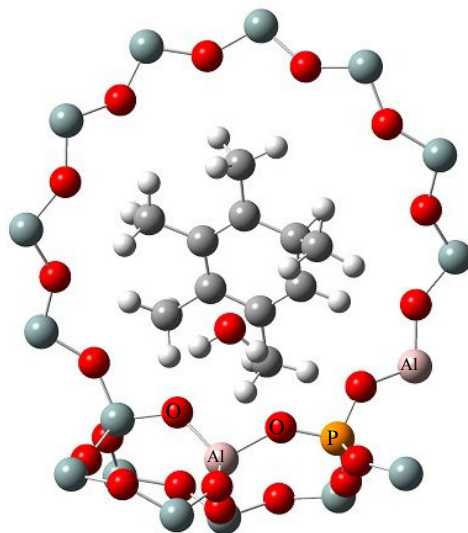

(b)

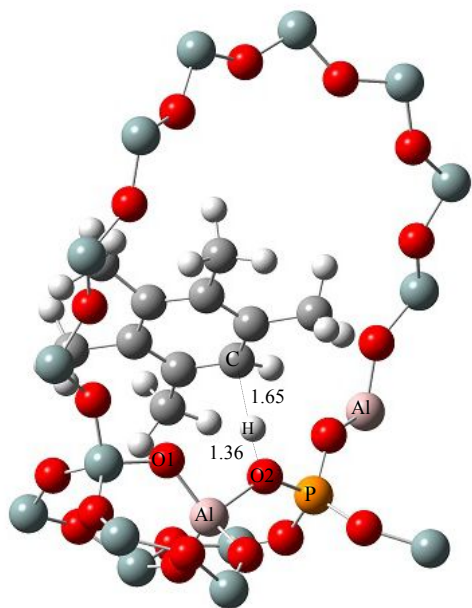

(c)

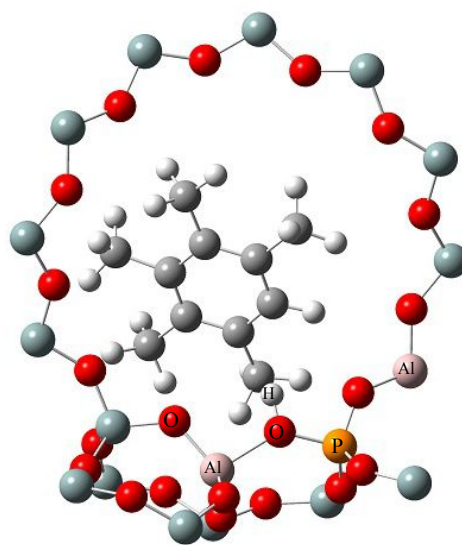

(d)

**Fig. S16** Optimized structures of (a) TS-paring-8, (b) INT-paring-6, (c) TS-paring-9, and (d) PMB.

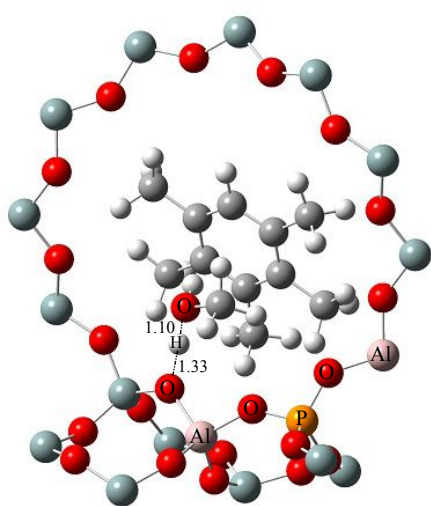

(a)

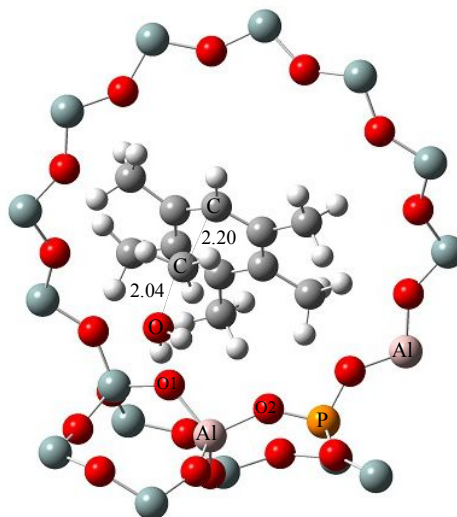

(b)

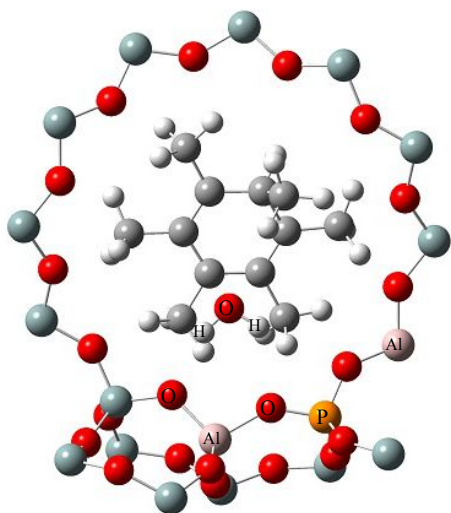

(c)

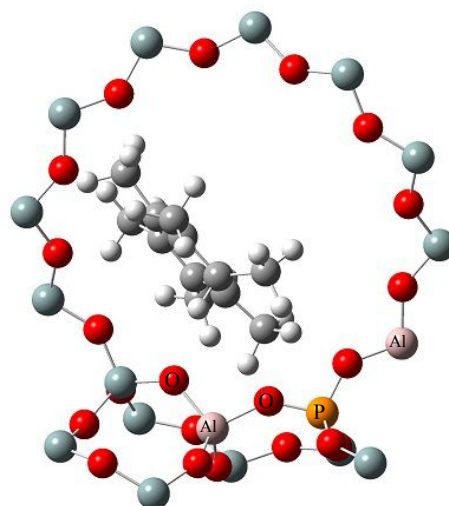

(d)

**Fig. S17** Optimized structures of (a) complex-paring-4, (b) TS-paring-10, (c) INT-paring-7, and (d) INT-paring-7-noH<sub>2</sub>O.

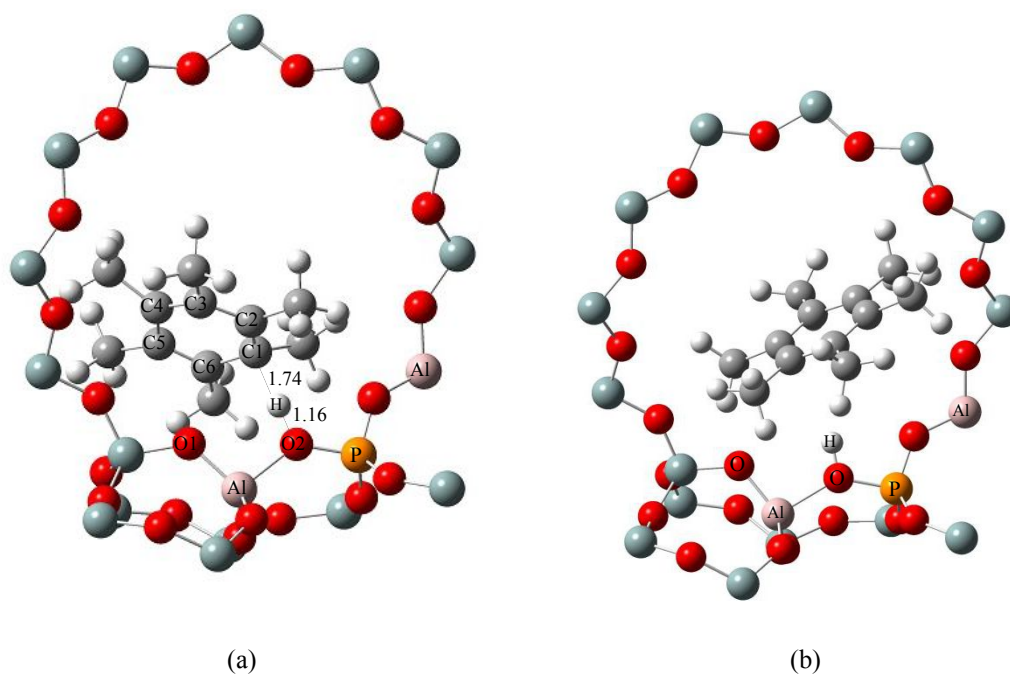

**Fig. S18** Optimized structures of (a) TS-paring-11, and (b) HMB.

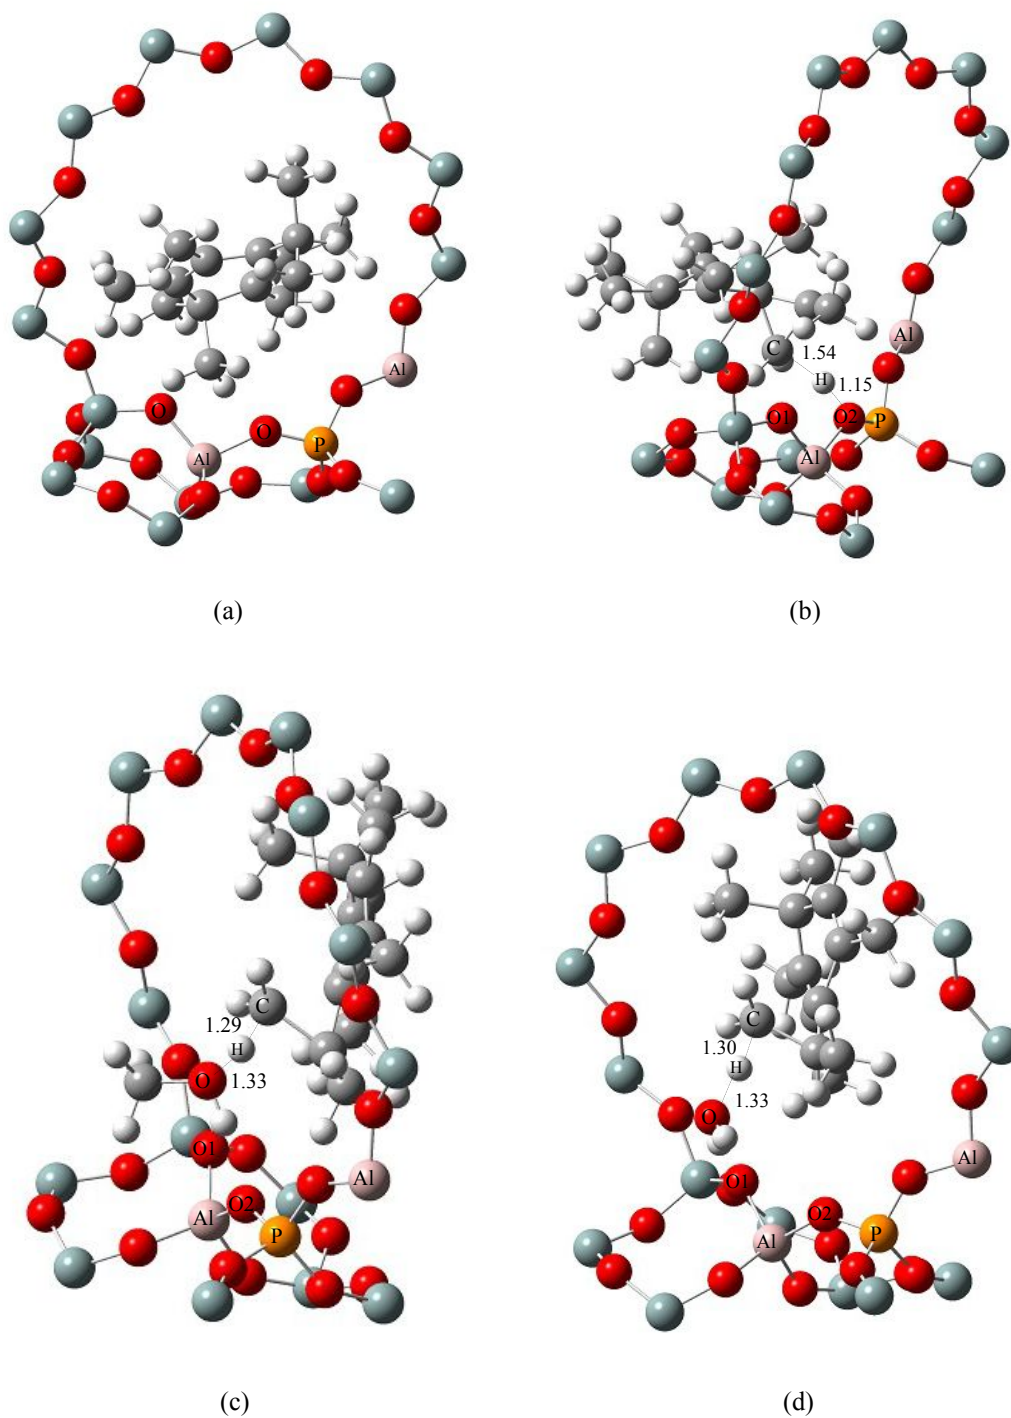

**Fig. S19** Optimized structures of (a) INT-direct-5-noH<sub>2</sub>O, (b) TS-spiro-1, (c) TS-spiro-1-CH<sub>3</sub>OH, and (d) TS-spiro-1-H<sub>2</sub>O.

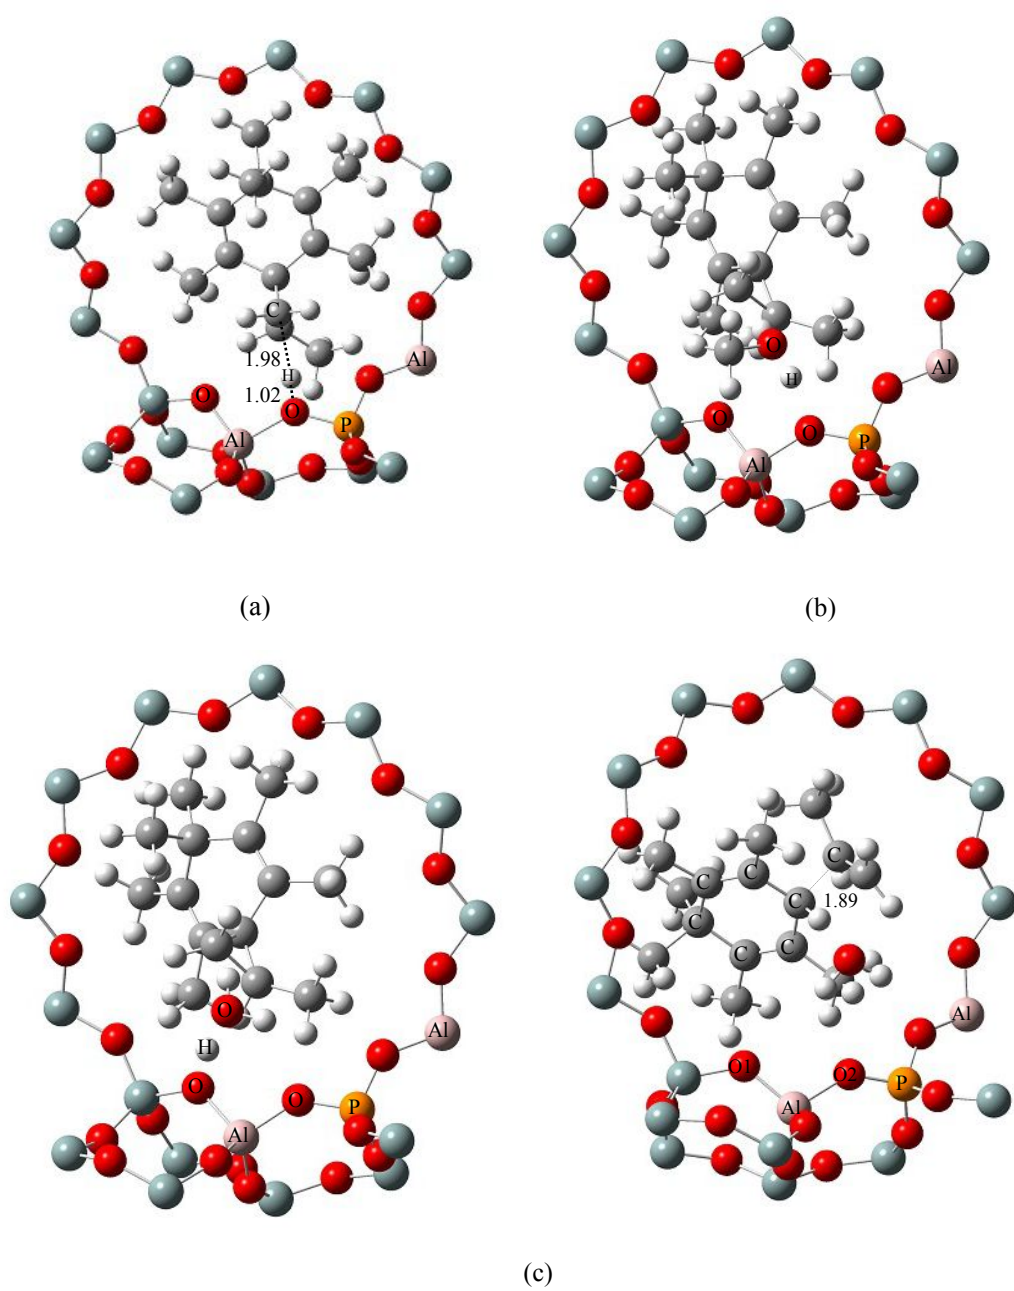

**Fig. S20** Optimized structures of (a) INT-spiro-1, (b) INT-spiro-1-CH<sub>3</sub>OH, (c) INT-spiro-1-H<sub>2</sub>O, and (d) TS-spiro-2-H<sub>2</sub>O.

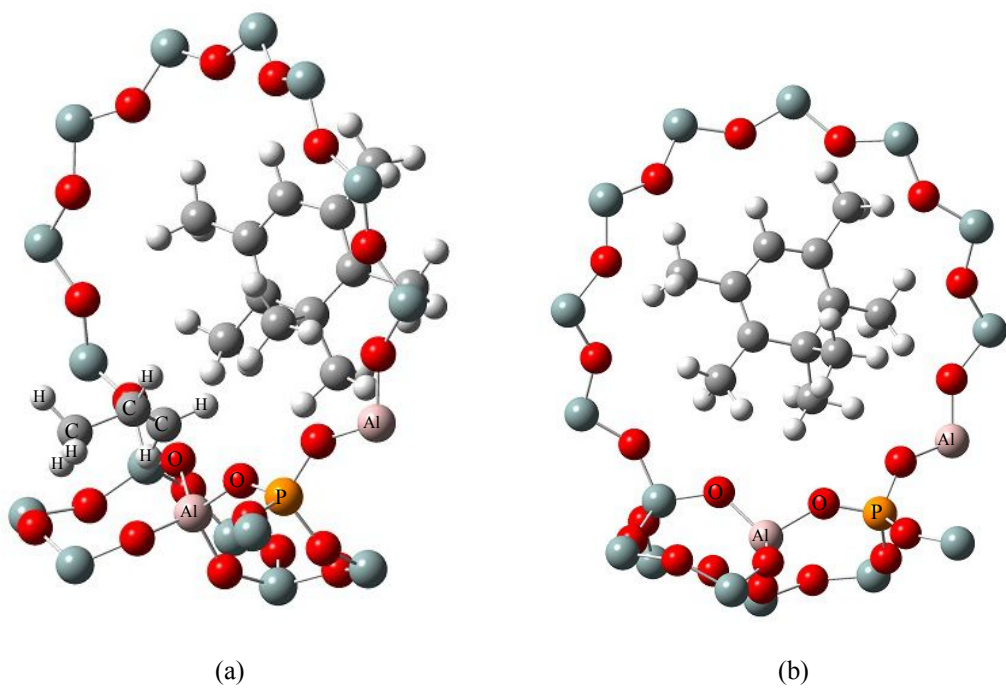

**Fig. S21** Optimized structures of (a) INT-direct-6, and (b) INT-direct-6-nopropene.

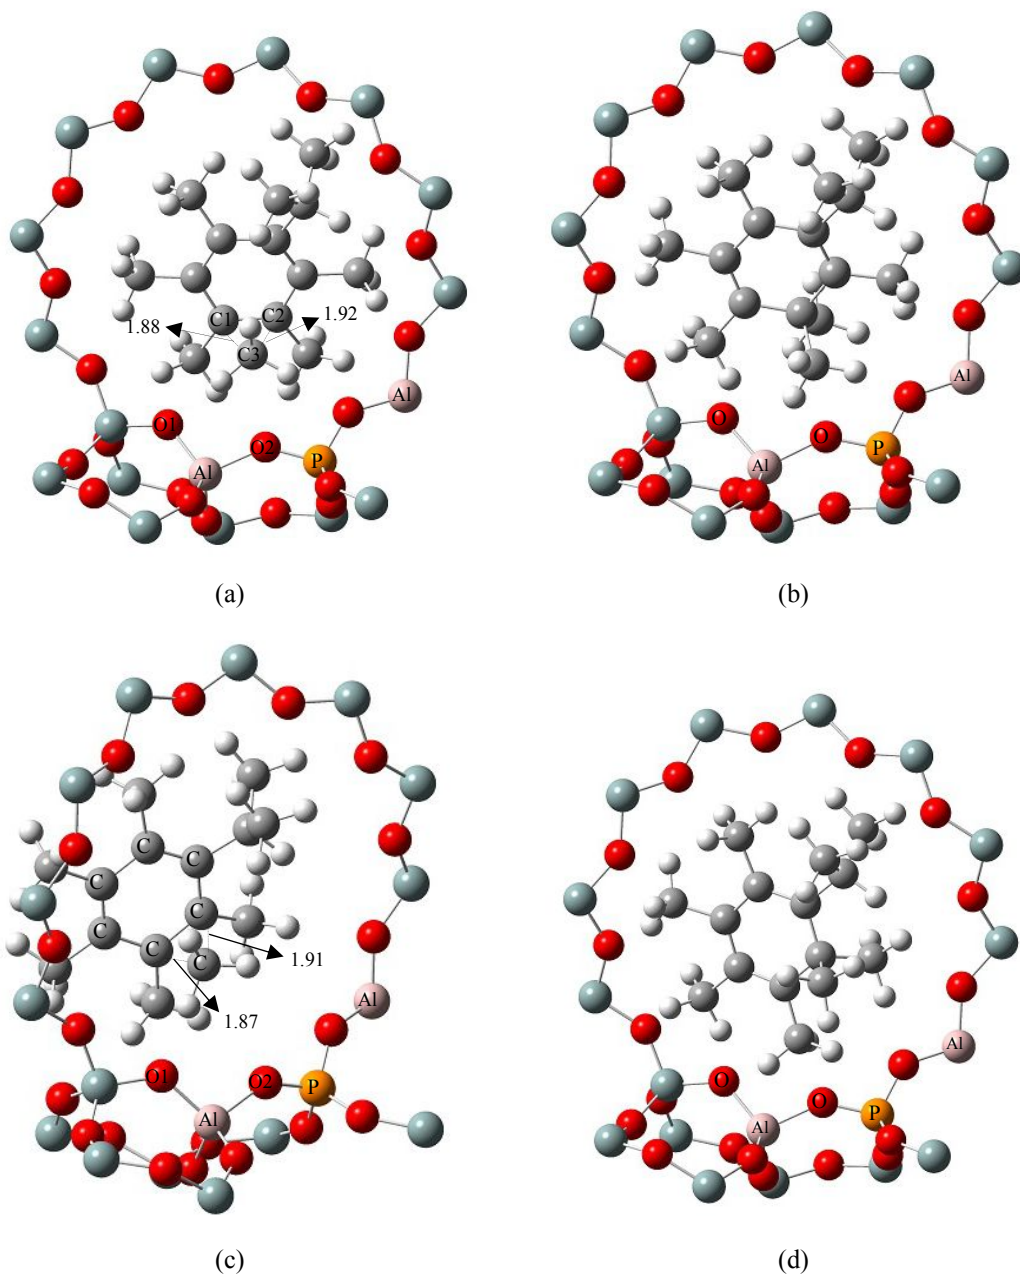

**Fig. S22** Optimized structures of (a) TS-ch3trans-1, (b) INT-ch3trans-1, (c) TS-ch3trans-2, and (d) INT-ch3trans-2.



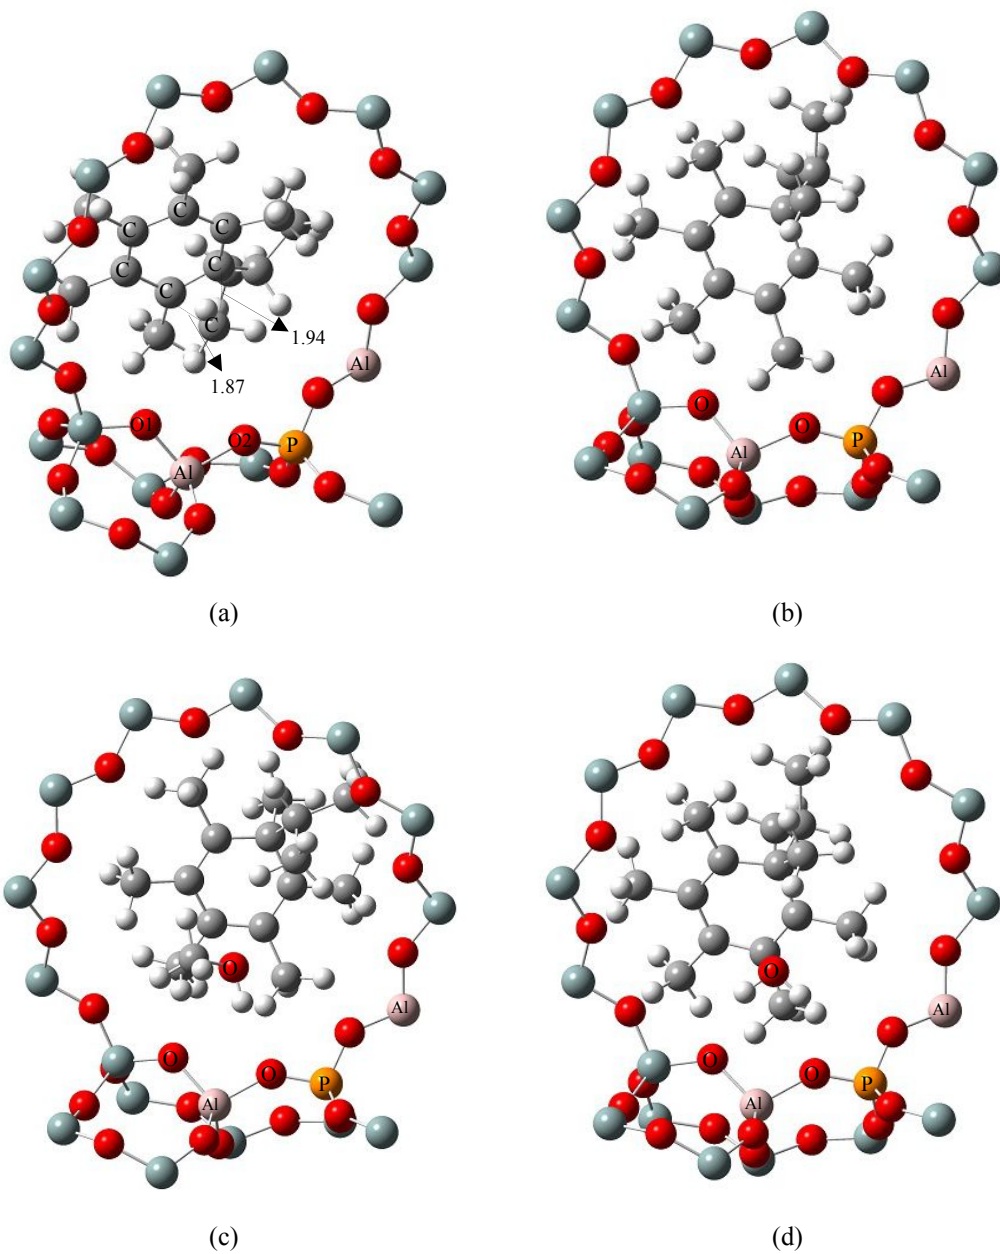

**Fig. S23** Optimized structures of (a) TS-ch3trans-3, (b) INT-ch3trans-3, (c) INT-ch3trans-3-CH<sub>3</sub>OH, and (d) INT-ch3trans-3-H<sub>2</sub>O.

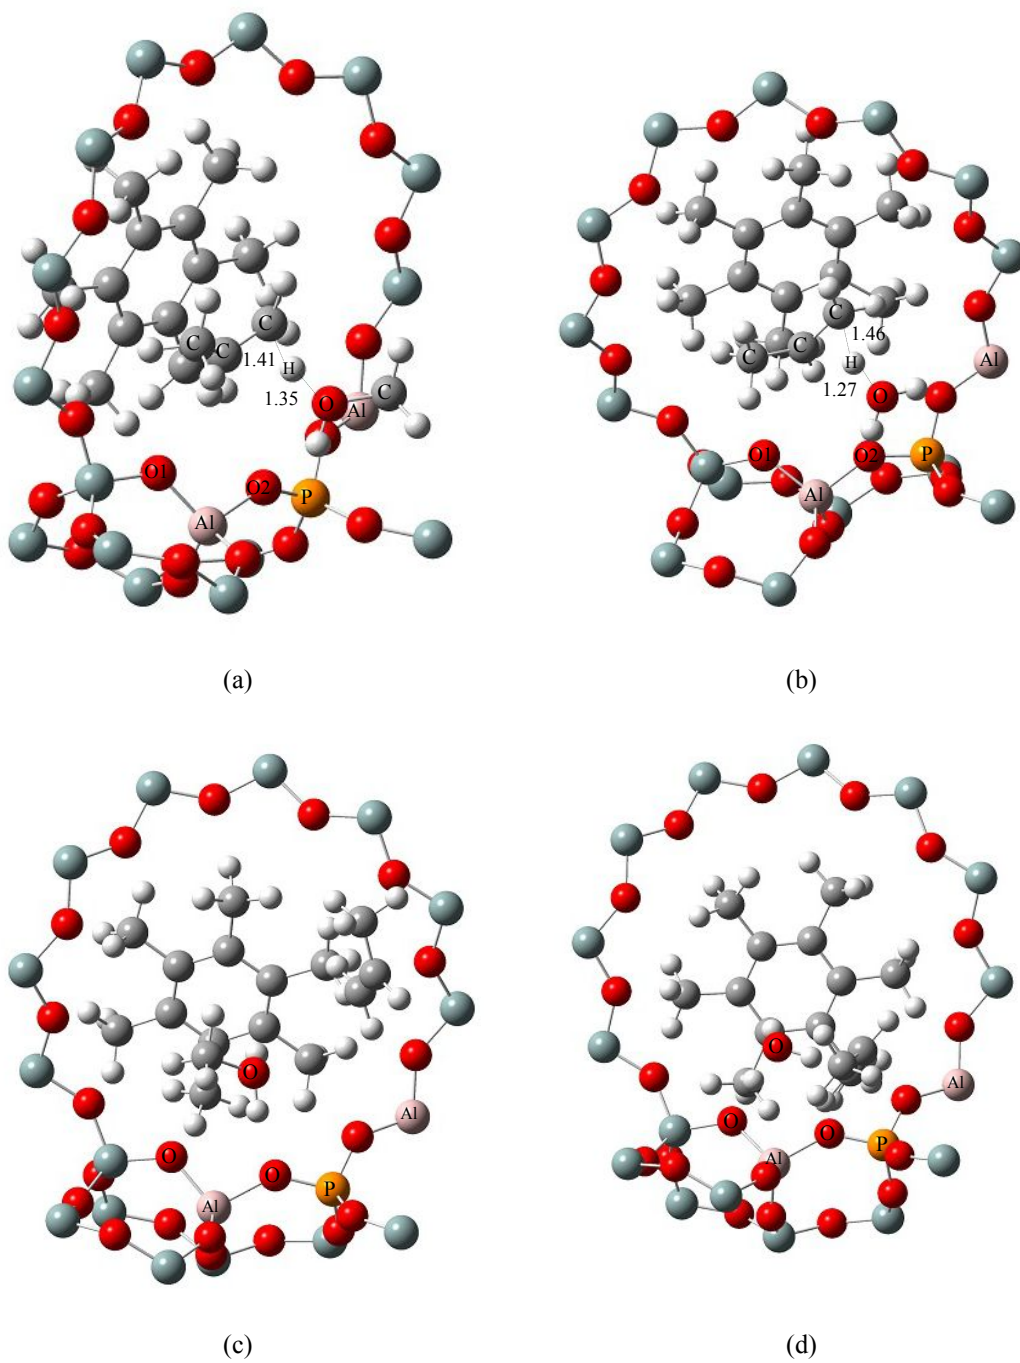

**Fig. S24** Optimized structures of (a) TS-ch3trans-4-CH<sub>3</sub>OH, (b) TS-ch3trans-4-H<sub>2</sub>O, (c) HMB-CH<sub>3</sub>OH, and (d) HMB-H<sub>2</sub>O.

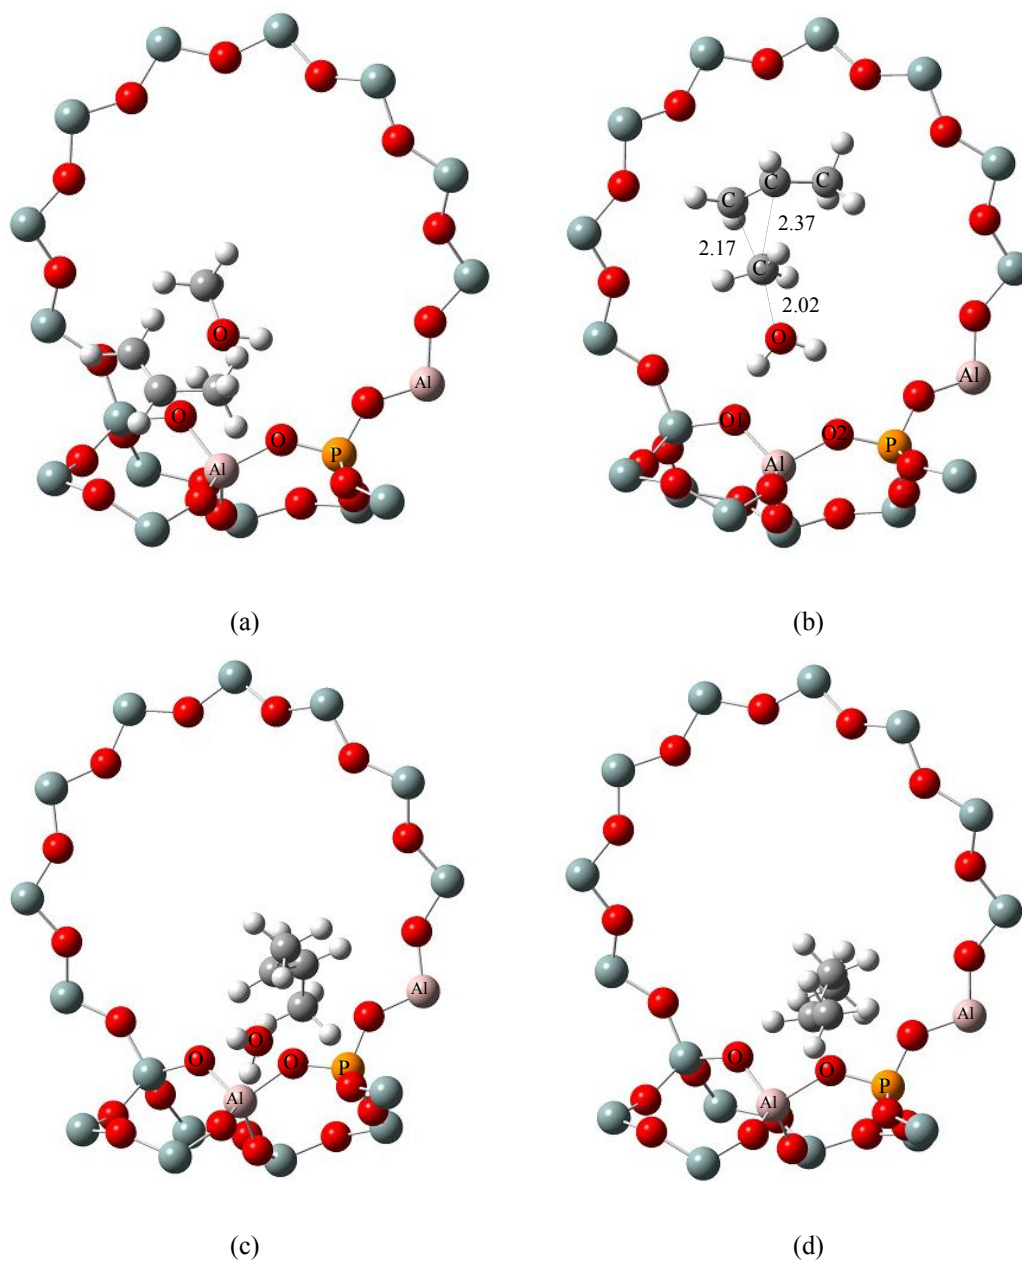

**Fig. S25** Optimized structures of (a) complex-alkene-1, (b) TS-alkene-1, (c) INT-alkene-1, and (d) INT-alkene-noH<sub>2</sub>O-1.

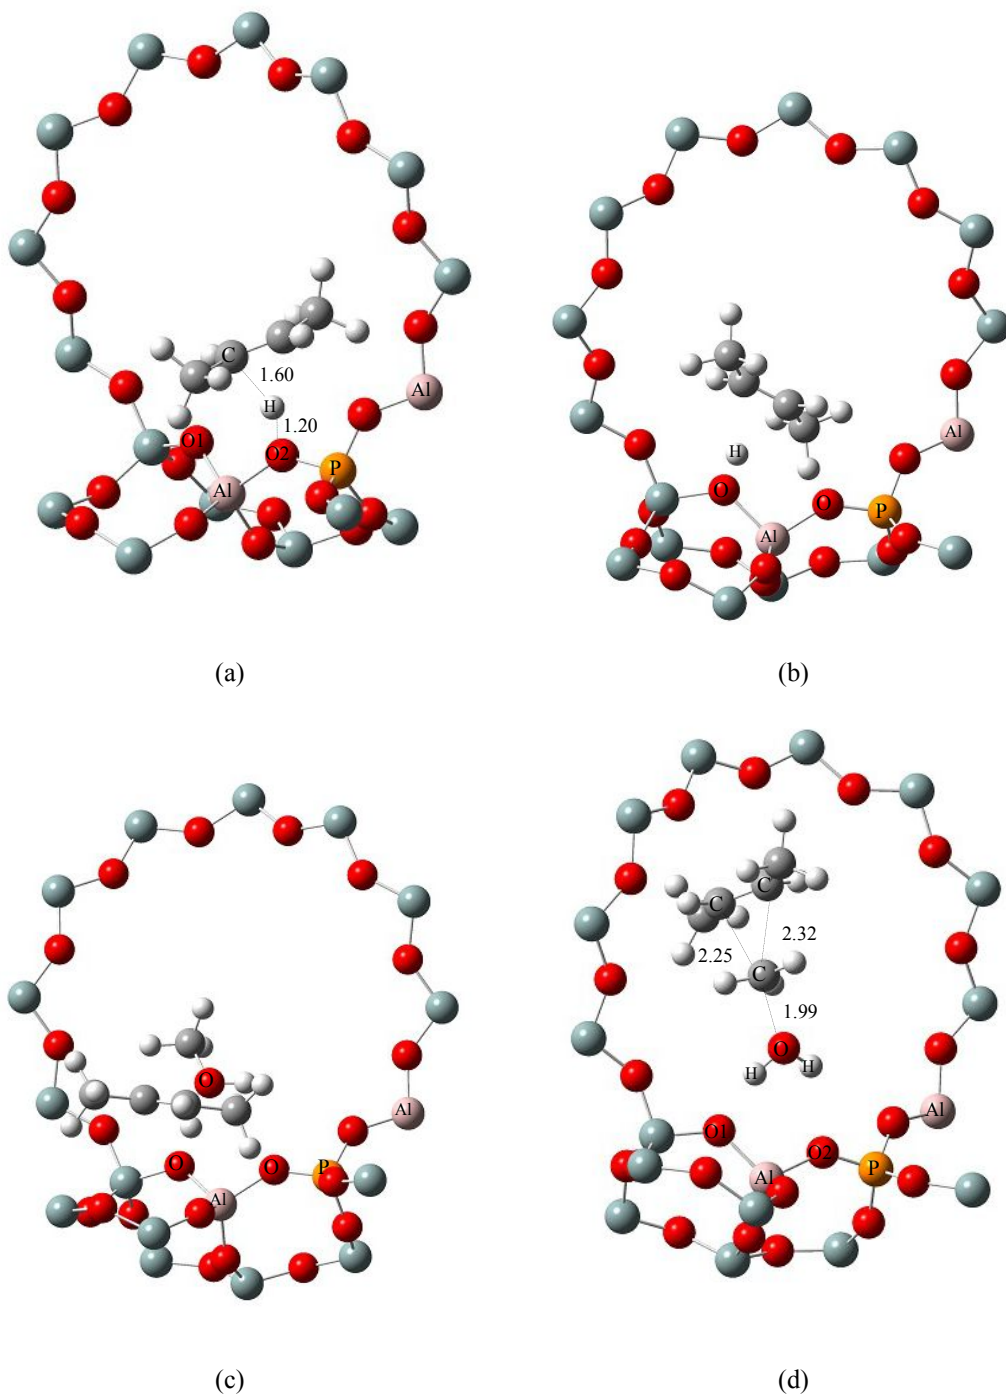

**Fig. S26** Optimized structures of (a) TS-alkene-2, (b) INT-alkene-2, (c) complex-alkene-2, and (d) TS-alkene-3.

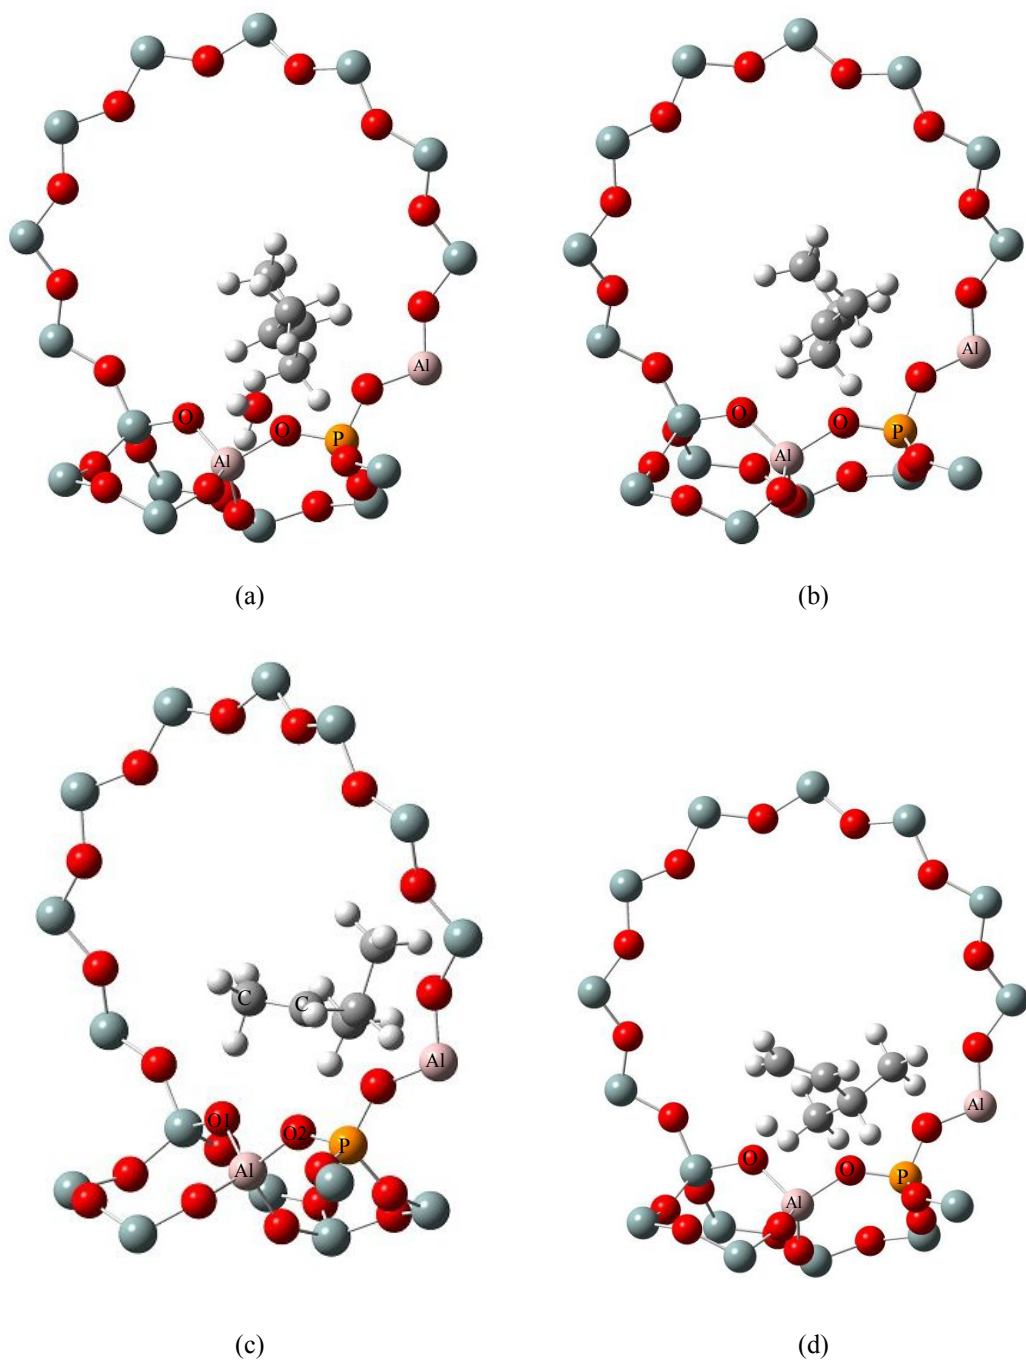

**Fig. S27** Optimized structures of (a) INT-alkene-3, (b) INT-alkene-3-noH<sub>2</sub>O, (c) TS-alkene-4, and (d) INT-alkene-4.

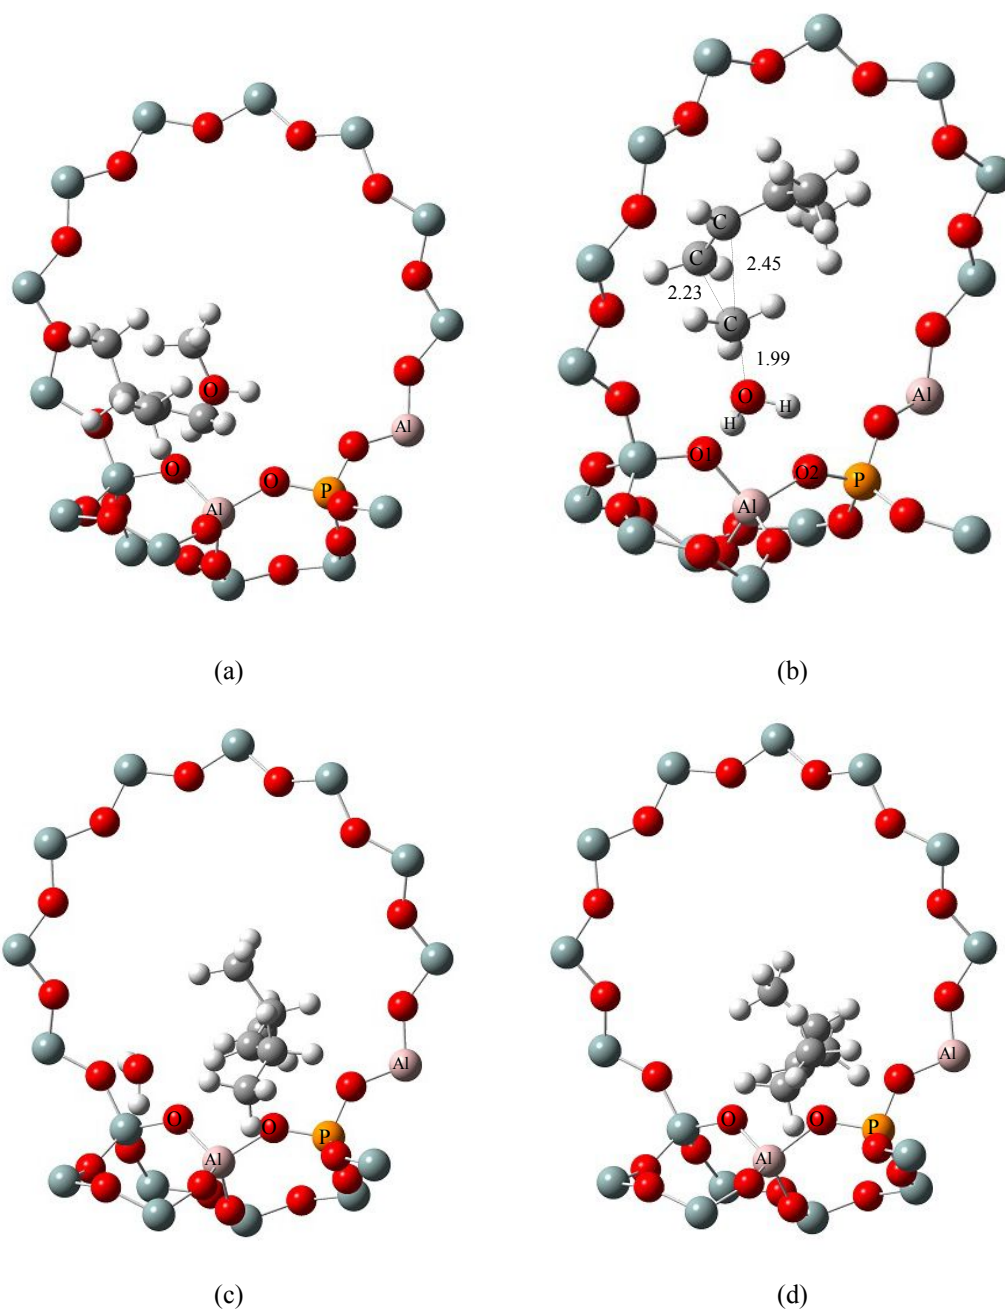

**Fig. S28** Optimized structures of (a) complex-alkene-3, (b) TS-alkene-5, (c) INT-alkene-5, and (d) INT-alkene-5-noH<sub>2</sub>O.

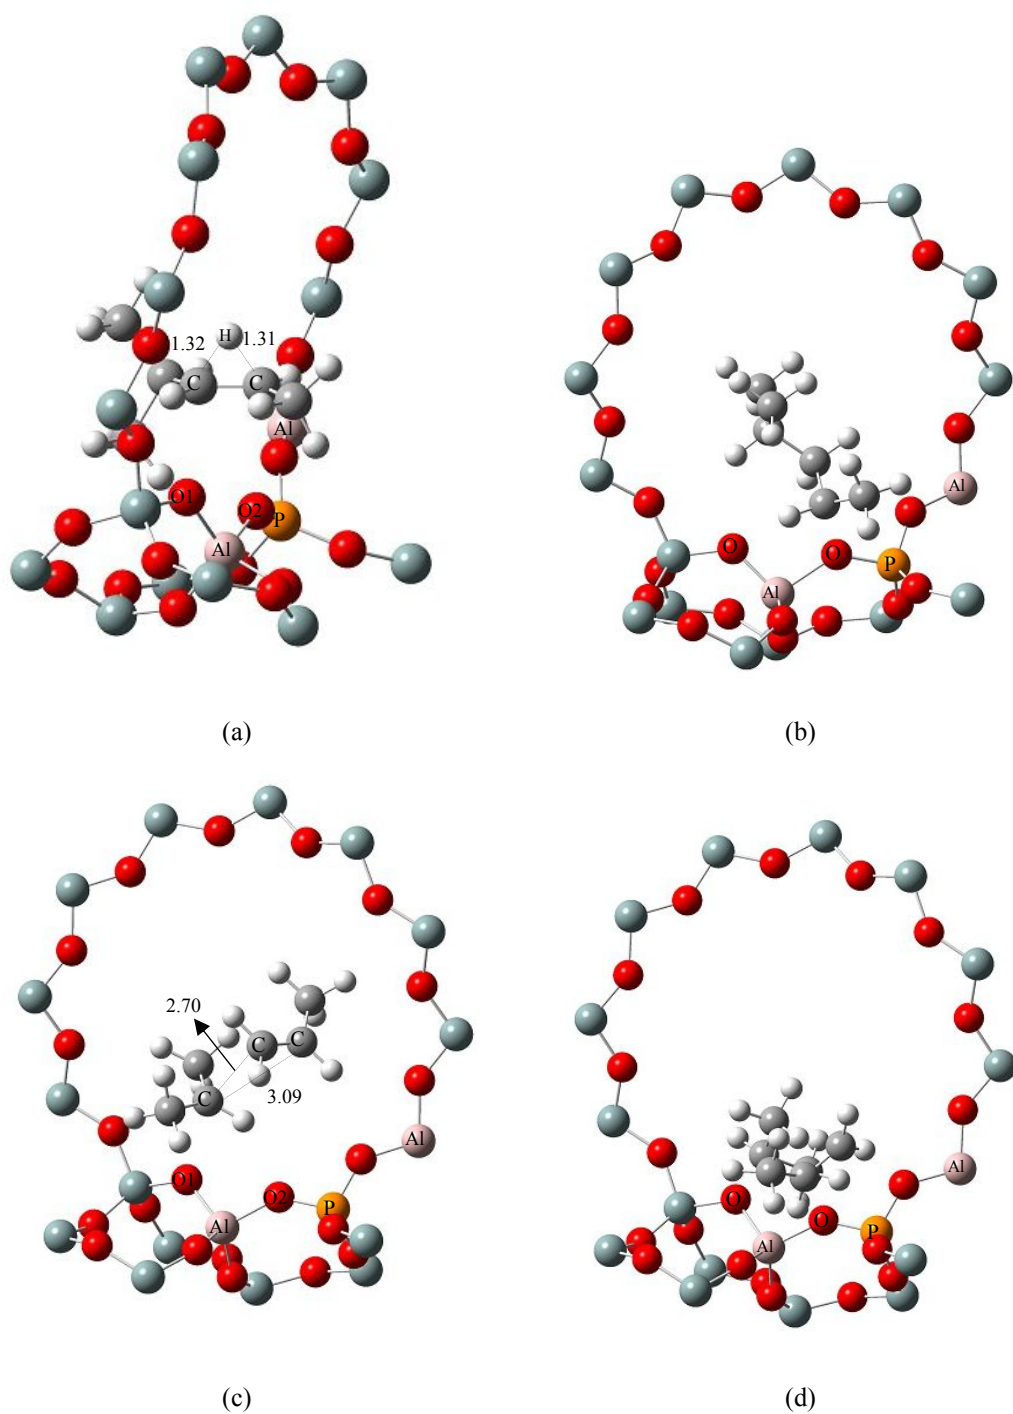

**Fig. S29** Optimized structures of (a) TS-alkene-6, (b) INT-alkene-6, (c) TS-alkene-7, and (d) INT-alkene-7.

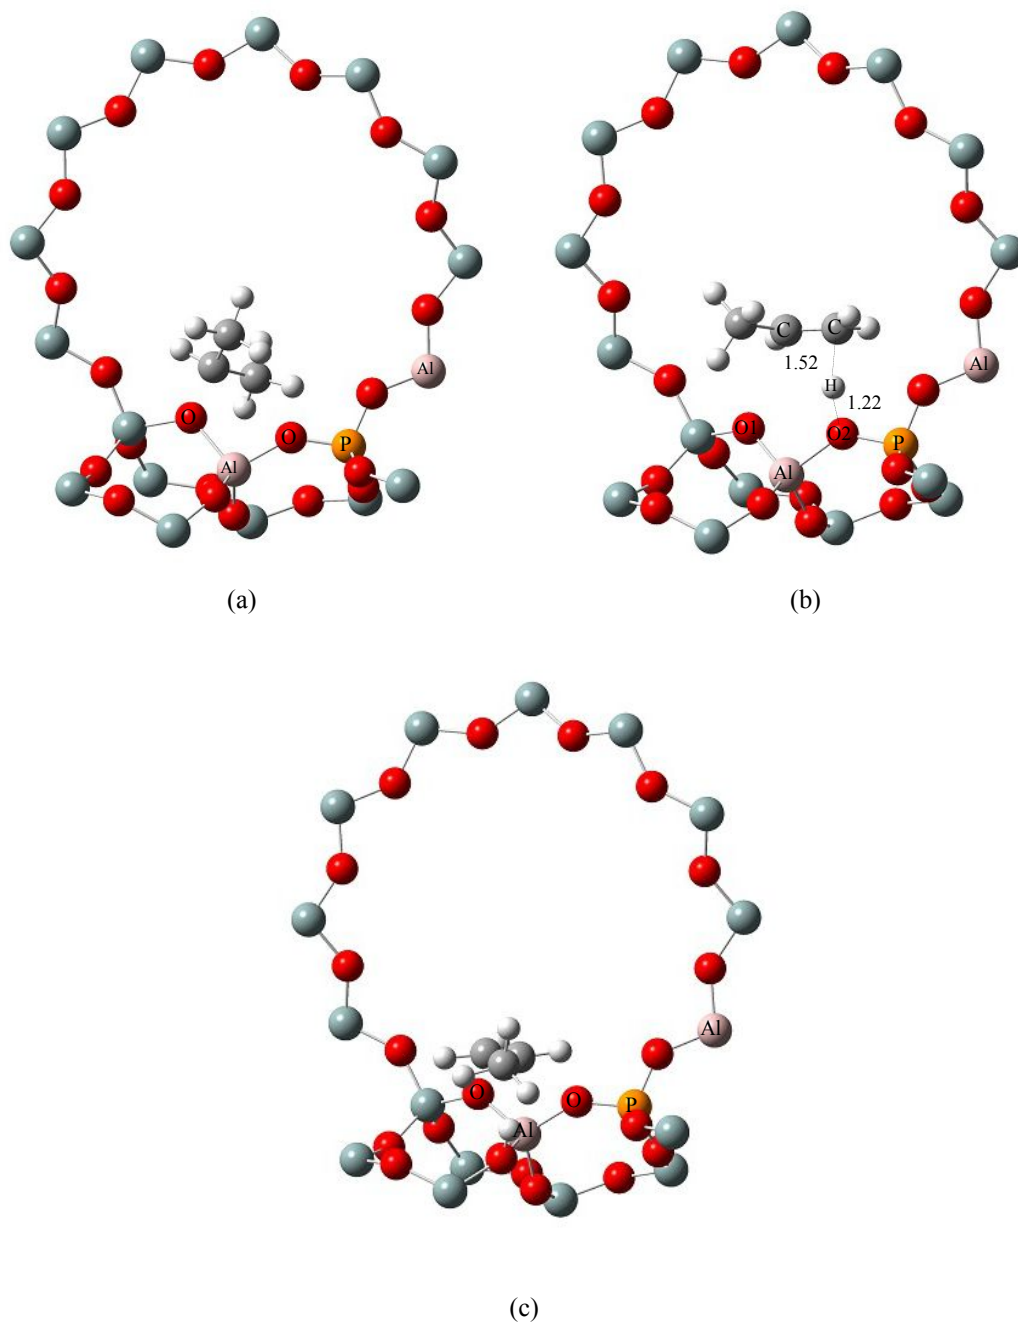

**Fig. S30** Optimized structures of (a) INT-alkene-7-nopropene, (b) TS-alkene-8, and (c) propene.



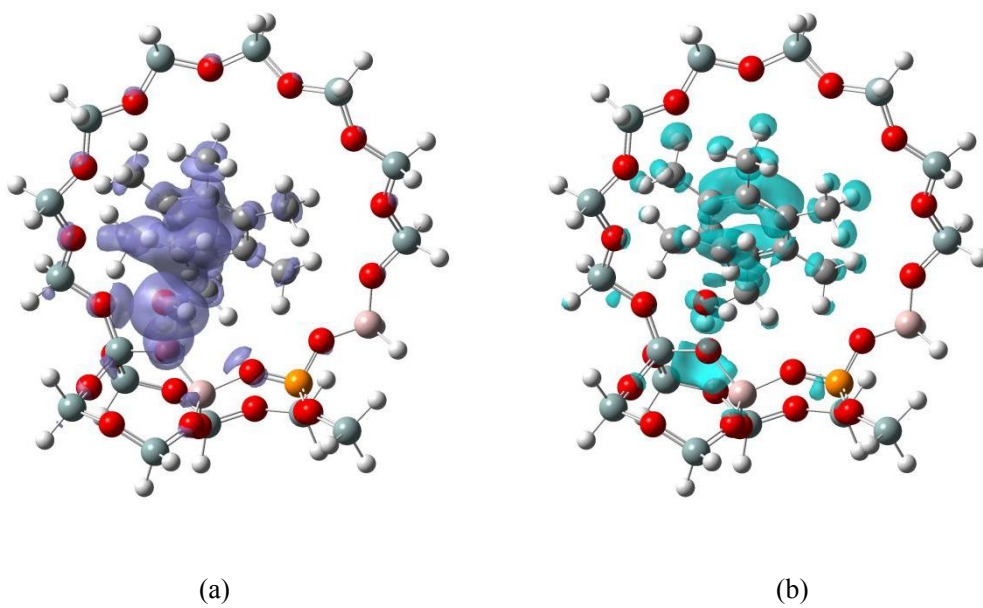

**Fig. S31** Difference charge densities for TS-direct-1. (a) positive DCD and (b) negative DCD.

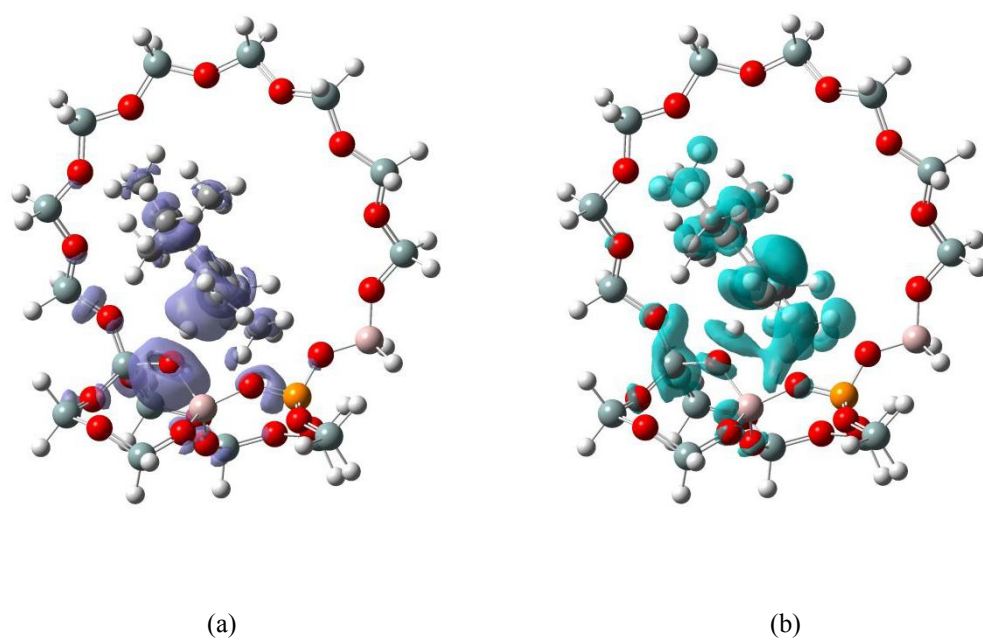

**Fig. S32** Difference charge densities for TS-direct-2. (a) positive DCD and (b) negative DCD.

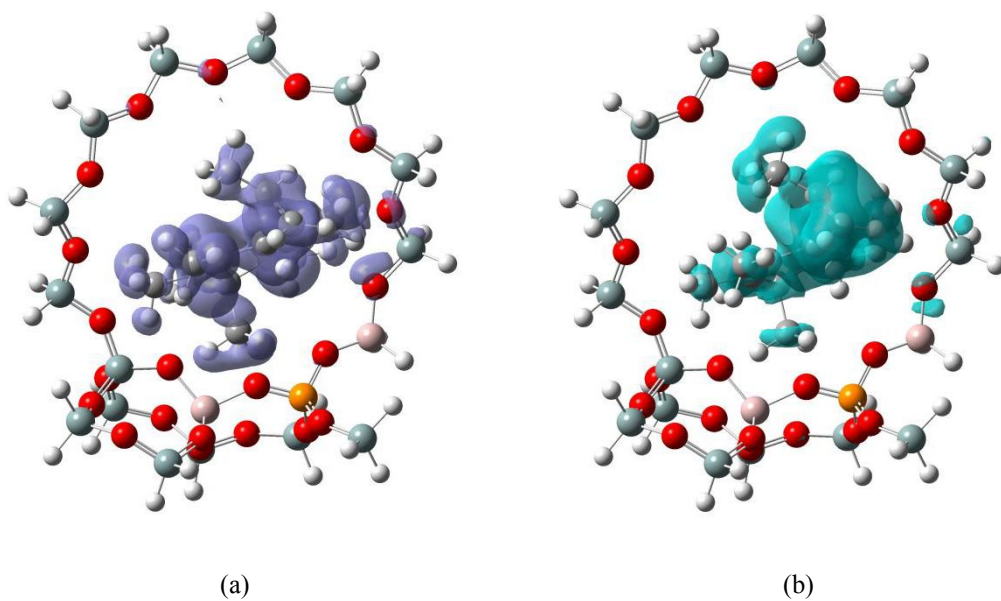

**Fig. S33** Difference charge densities for TS-direct-6. (a) positive DCD and (b) negative DCD.

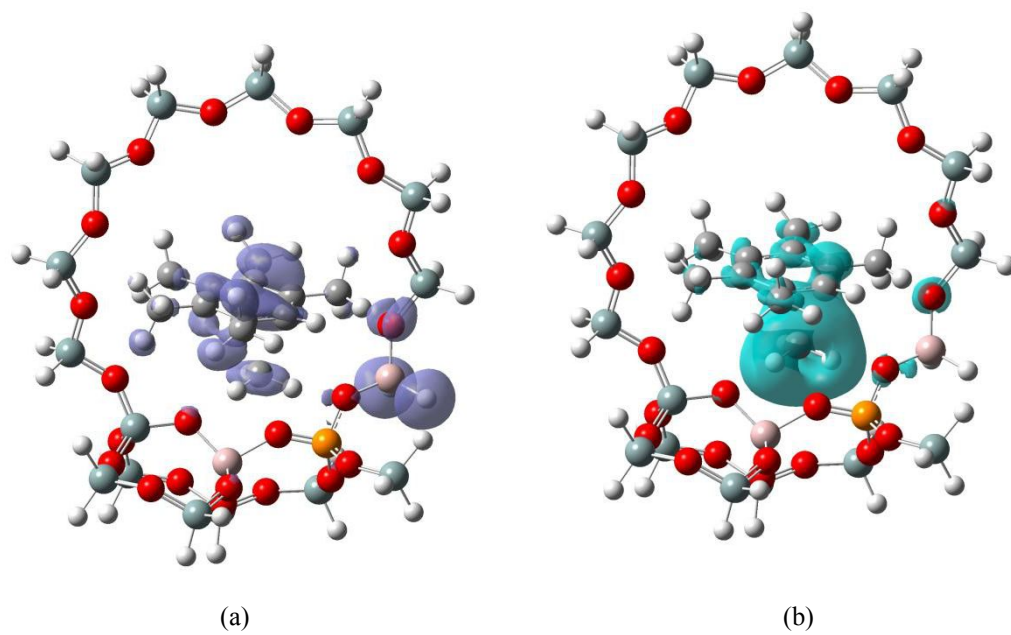

**Fig. S34** Difference charge densities for TS-direct-7. (a) positive DCD and (b) negative DCD.

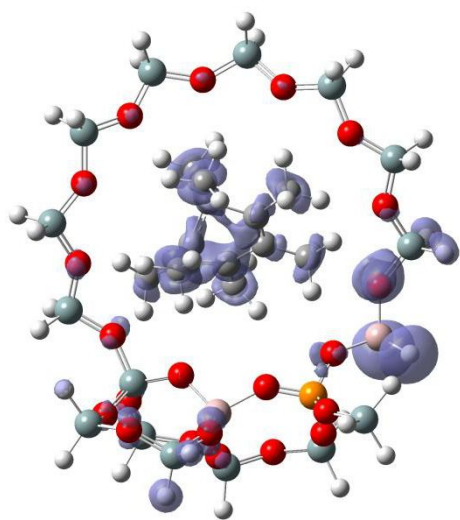

(a)

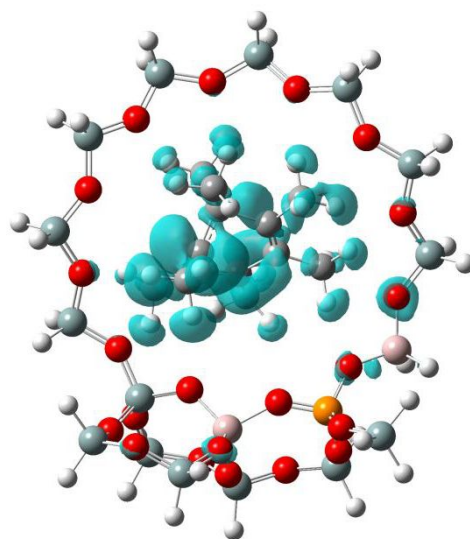

(b)

**Fig. S35** Difference charge densities for TS-paring-1. (a) positive DCD and (b) negative DCD.

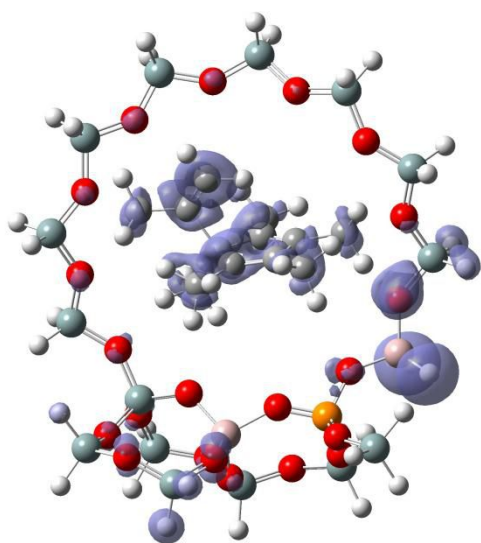

(a)

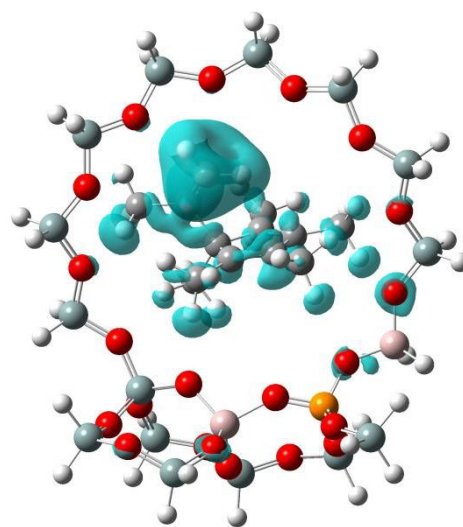

(b)

**Fig. S36** Difference charge densities for TS-paring-2. (a) positive DCD and (b) negative DCD.

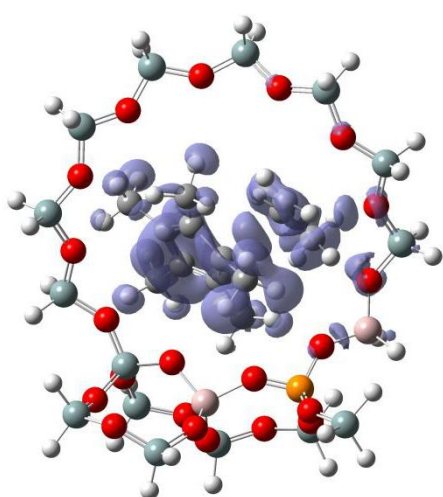

(a)

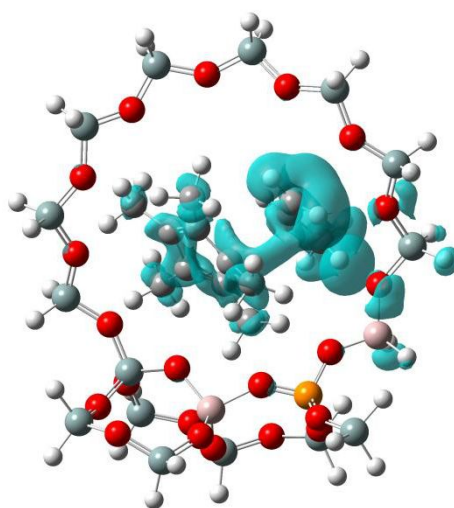

(b)

**Fig. S37** Difference charge densities for TS-paring-3. (a) positive DCD and (b) negative DCD.

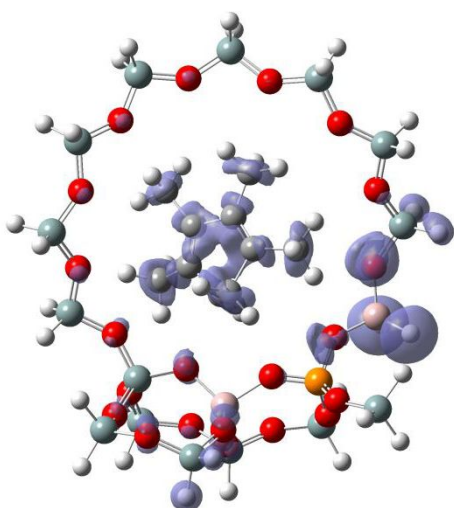

(a)

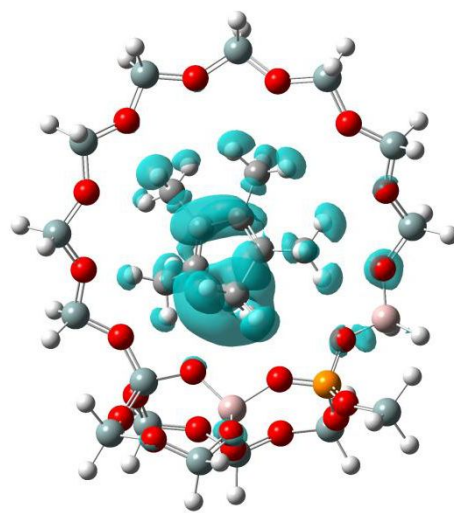

(b)

**Fig. S38** Difference charge densities for TS-paring-6. (a) positive DCD and (b) negative DCD.

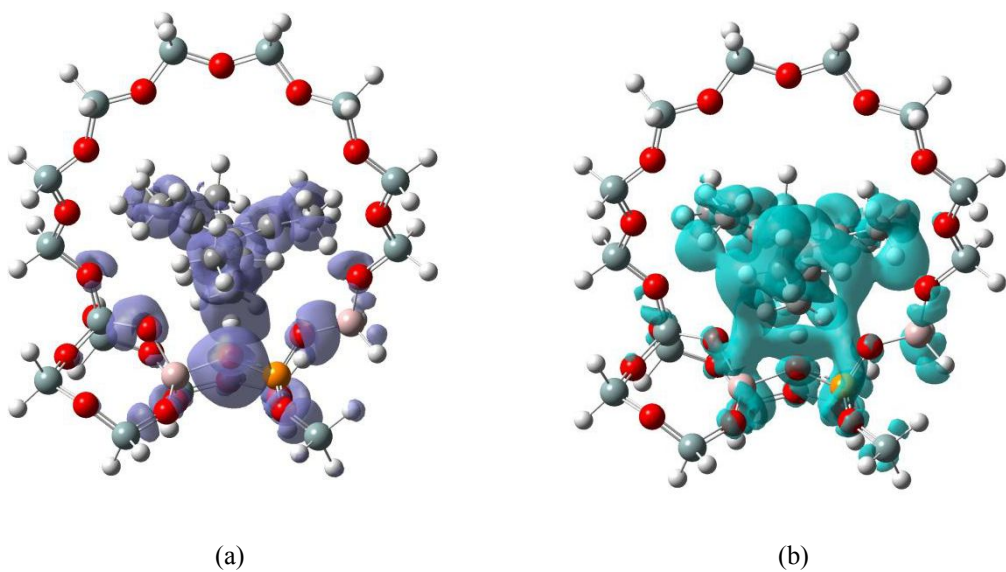

**Fig. S39** Difference charge densities for TS-spiro-1. (a) positive DCD and (b) negative DCD.

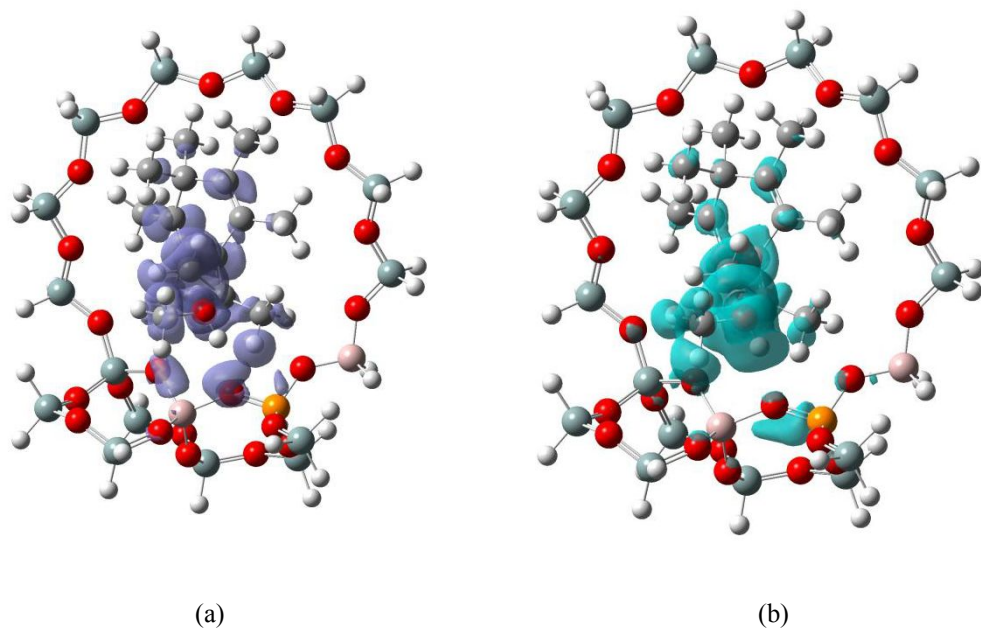

**Fig. S40** Difference charge densities for TS-spiro-1-CH<sub>3</sub>OH. (a) positive DCD and (b) negative DCD.

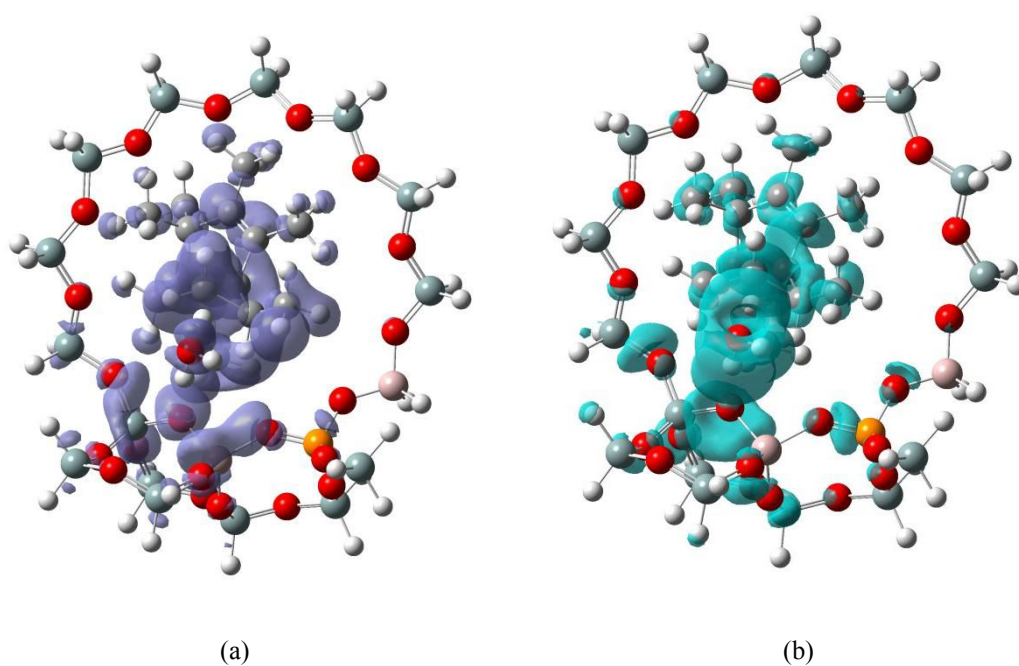

**Fig. S41** Difference charge densities for TS-spiro-1-H<sub>2</sub>O. (a) positive DCD and (b) negative DCD.

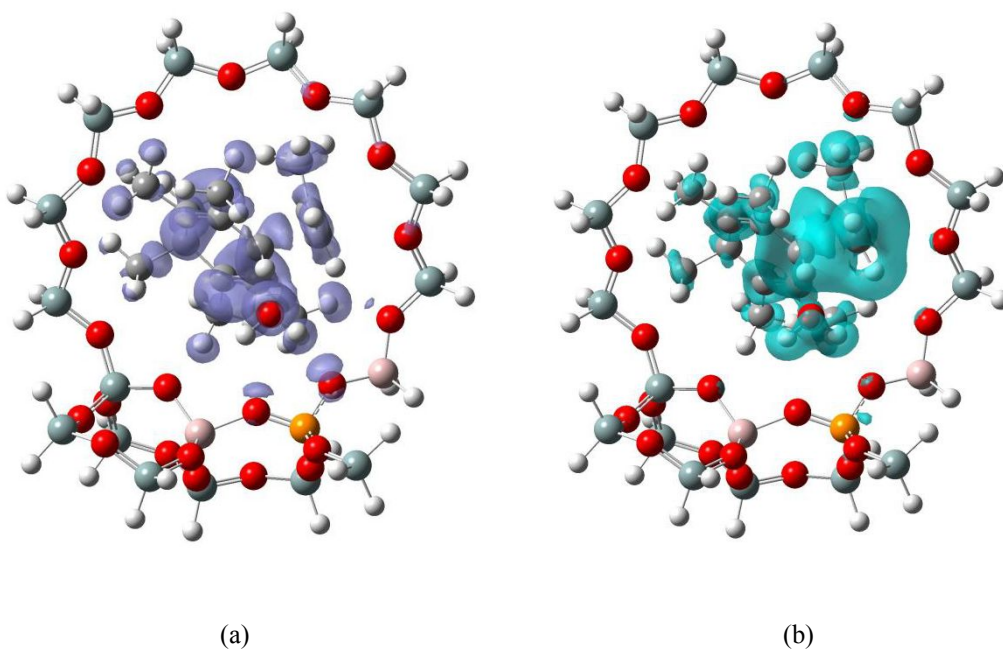

**Fig. S42** Difference charge densities for TS-spiro-2-H<sub>2</sub>O. (a) positive DCD and (b) negative DCD.

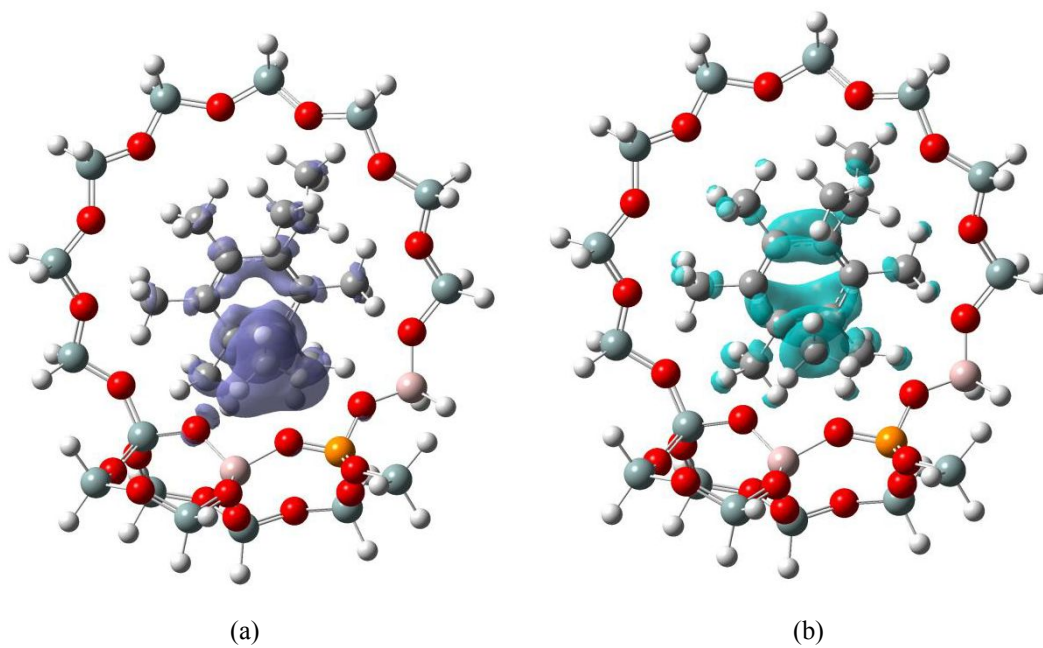

**Fig. S43** Difference charge densities for TS-ch3trans-1. (a) positive DCD and (b) negative DCD.

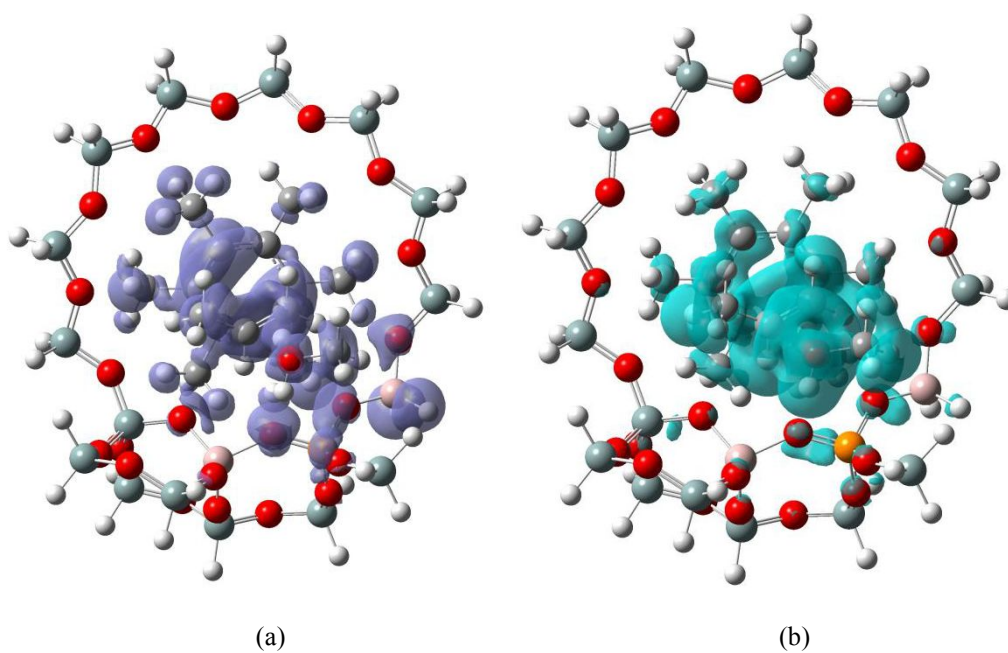

**Fig. S44** Difference charge densities for TS-ch3trans-4-CH<sub>3</sub>OH. (a) positive DCD and (b) negative DCD.

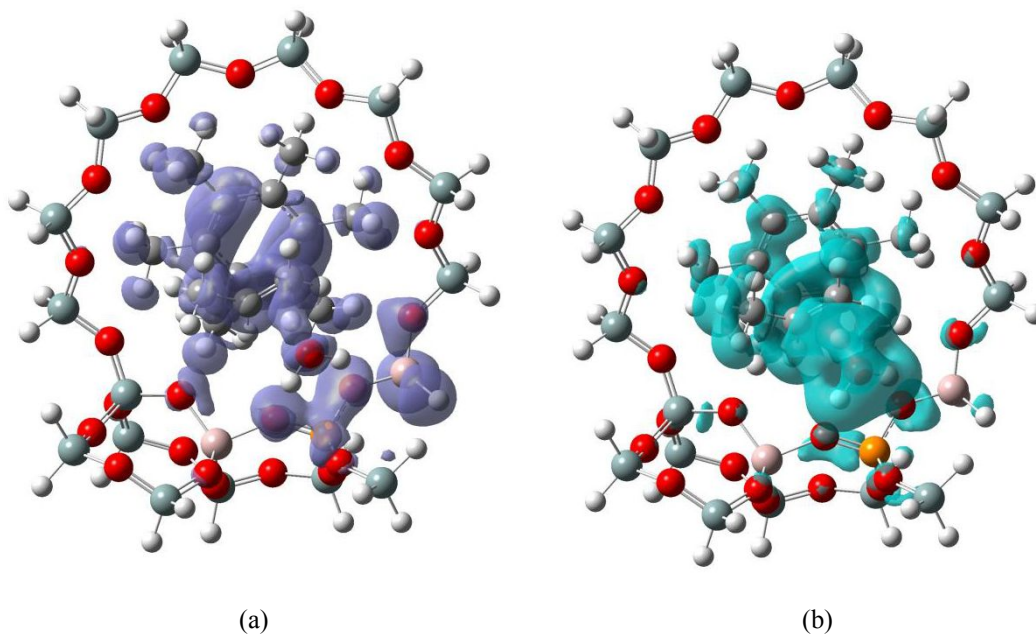

**Fig. S45** Difference charge densities for TS-ch3trans-4-H<sub>2</sub>O. (a) positive DCD and (b) negative DCD.

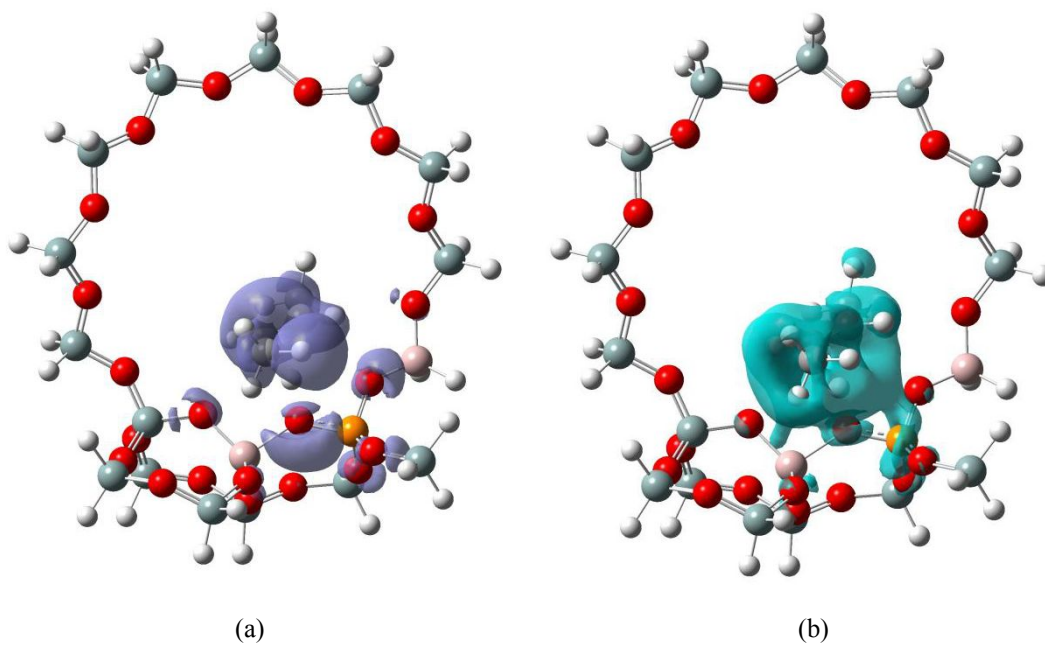

**Fig. S46** Difference charge densities for TS-alkene-2. (a) positive DCD and (b) negative DCD.



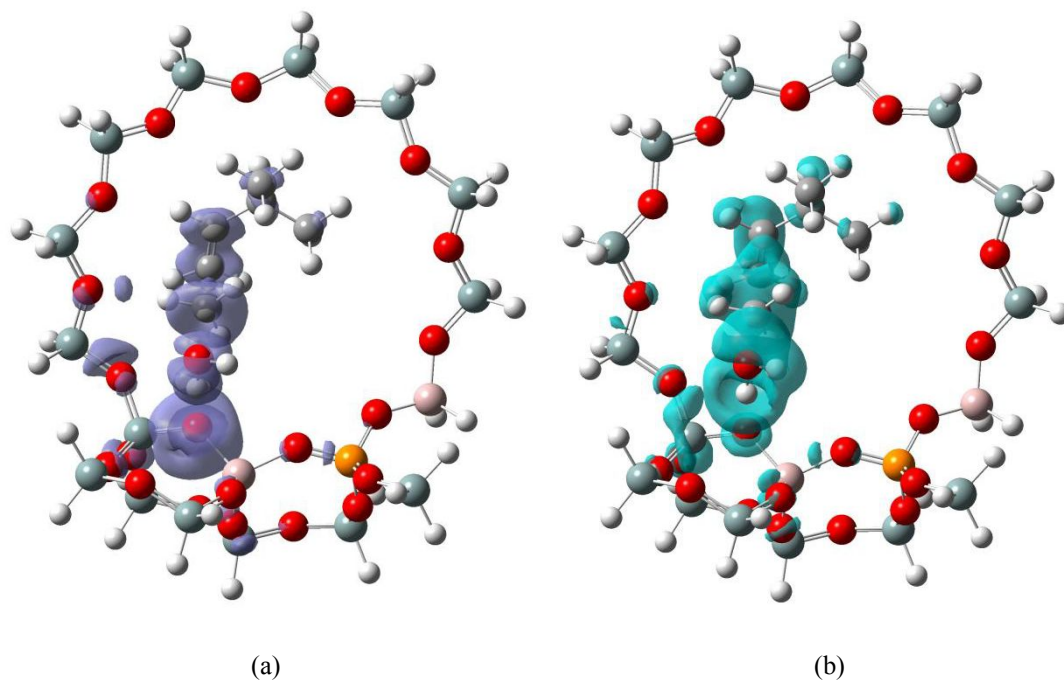

**Fig. S47** Difference charge densities for TS-alkene-5. (a) positive DCD and (b) negative DCD.

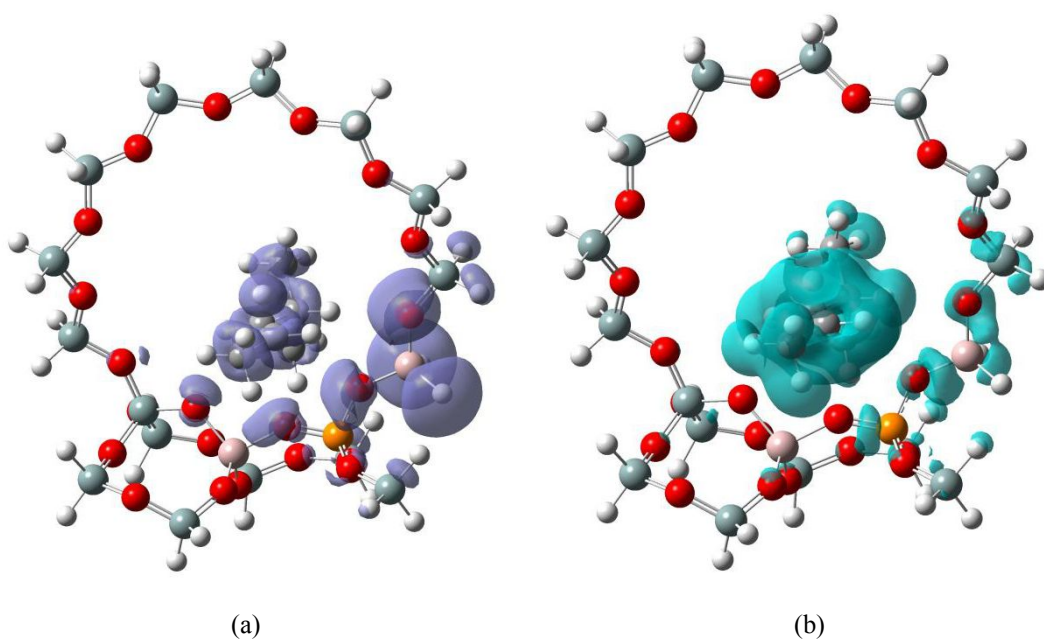

**Fig. S48** Difference charge densities for TS-alkene-6. (a) positive DCD and (b) negative DCD.

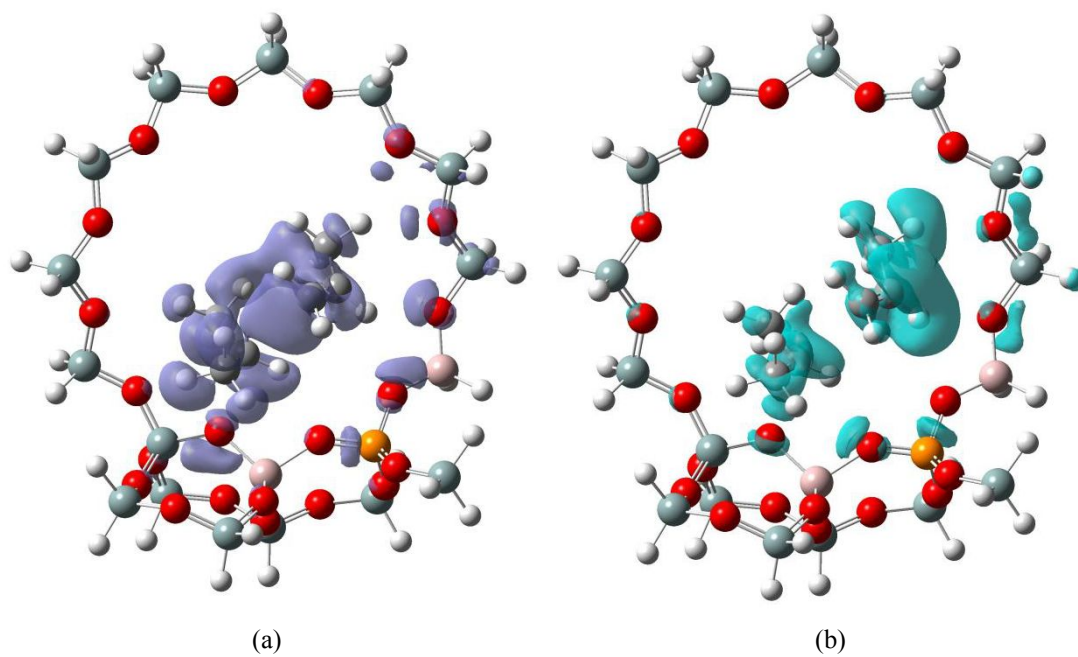

**Fig. S49** Difference charge densities for TS-alkene-7. (a) positive DCD and (b) negative DCD.

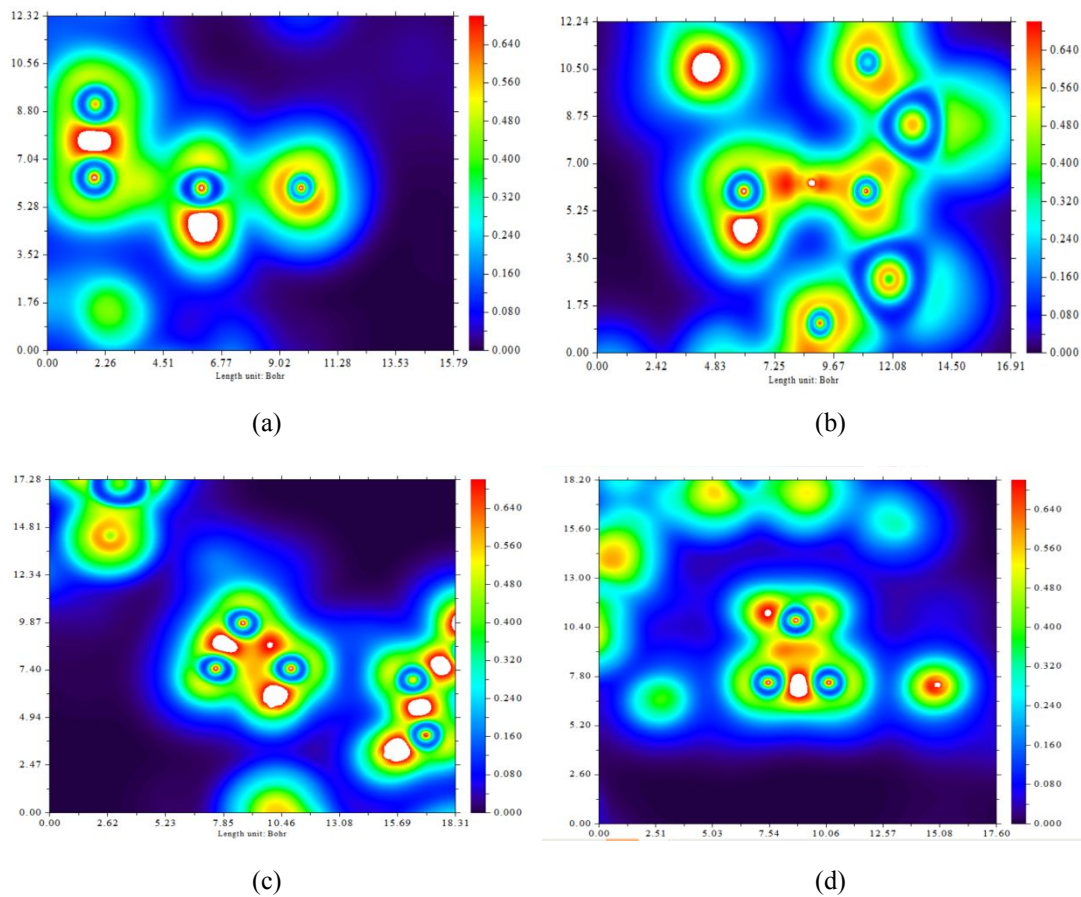

**Fig. S50** Color-filled maps of (a, b, c, d) LOLs. (a) TS-direct-1, (b) TS-direct-2, (c) TS-direct-6, (d) TS-direct-7.

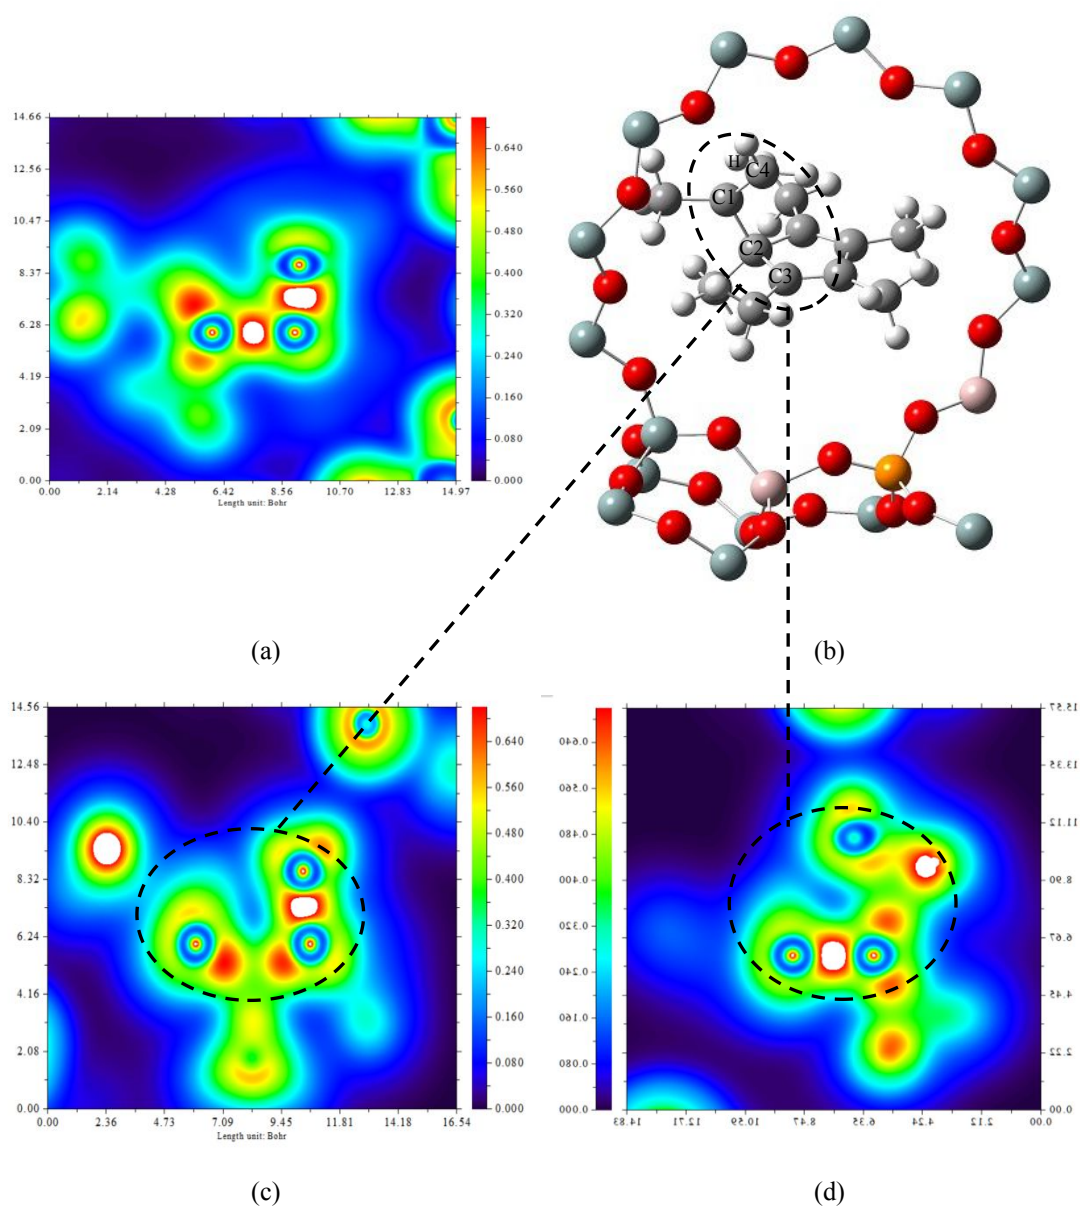

**Fig. S51** Color-filled maps of LOL (a) TS-paring-1, optimized structure of (b) TS-paring-2, color-filled maps of LOLs for (c) TS-paring-2 (C1, C3, C4), and (d) TS-paring-2 (C2, C3, H).

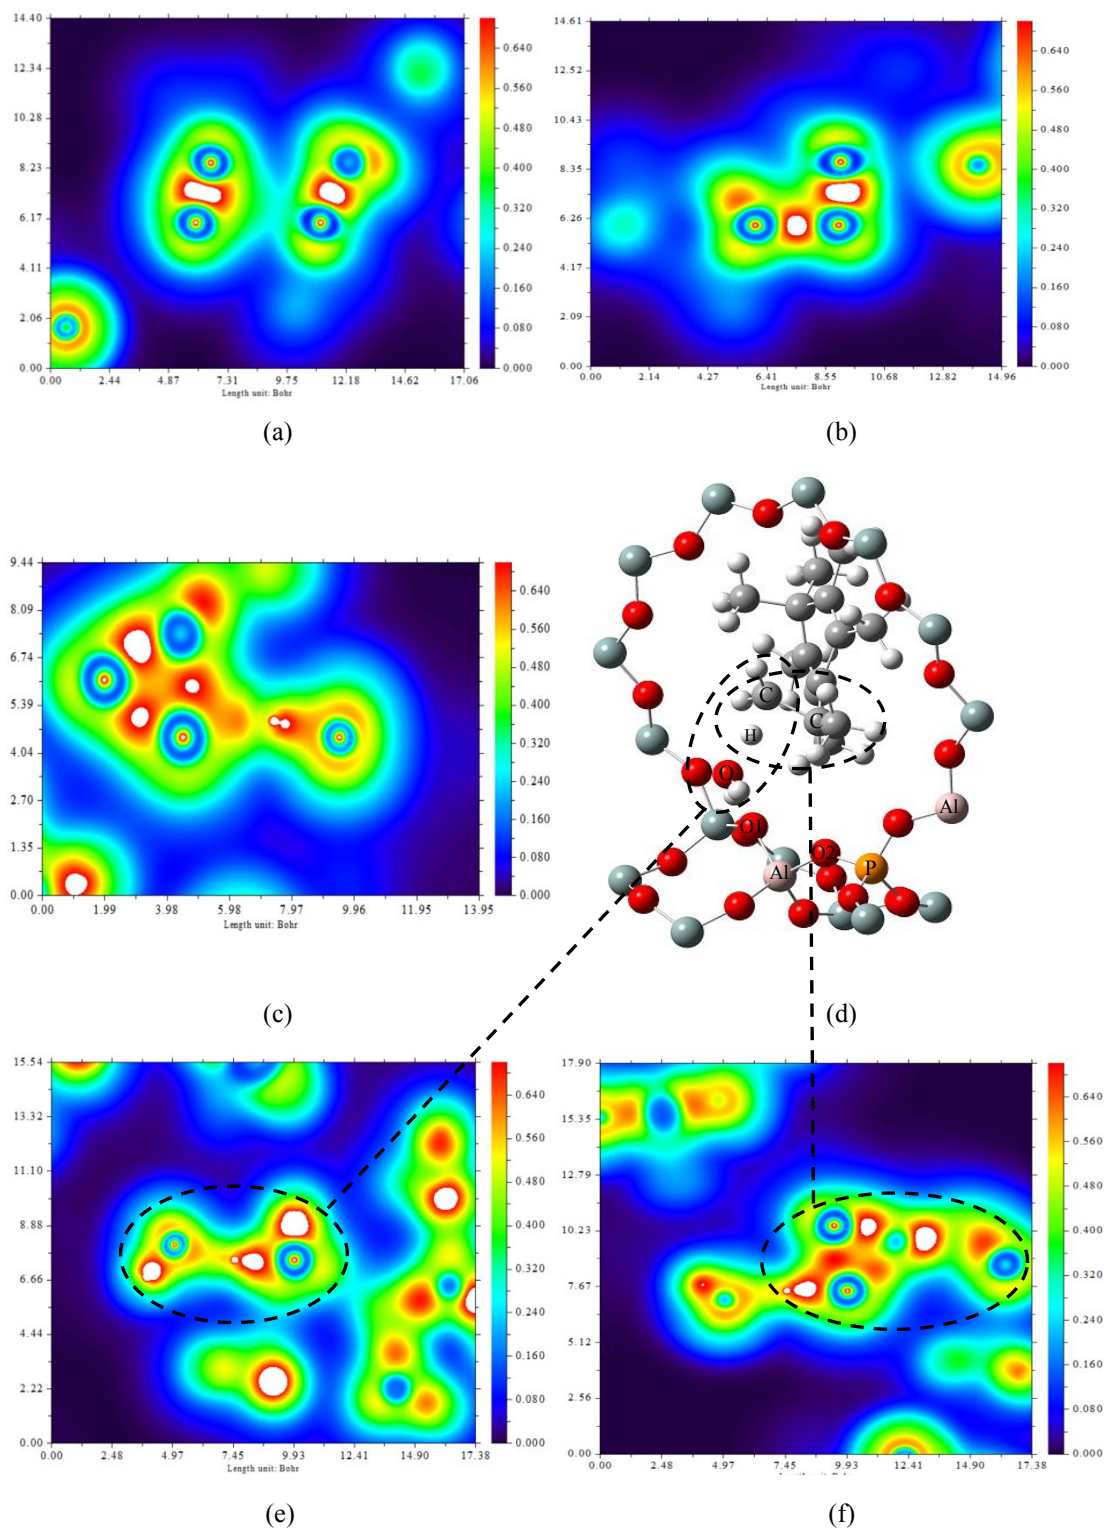

**Fig. S52** Color-filled maps of LOLs. (a) TS-paring-3, (b) TS-paring-6, (c) TS-spiro-1, optimized structure of (d) TS-spiro-1-H<sub>2</sub>O, color-filled maps of LOLs for (e, f) TS-spiro-1-H<sub>2</sub>O.

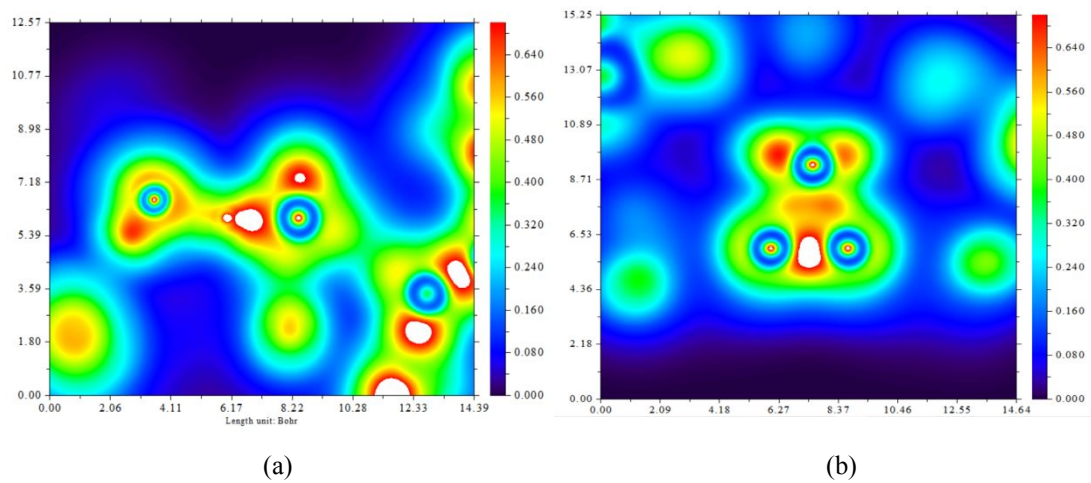

**Fig. S53** Color-filled maps of (a, b) LOLs. (a) TS-spiro-1-CH<sub>3</sub>OH, and (b) TS-ch3trans-1.

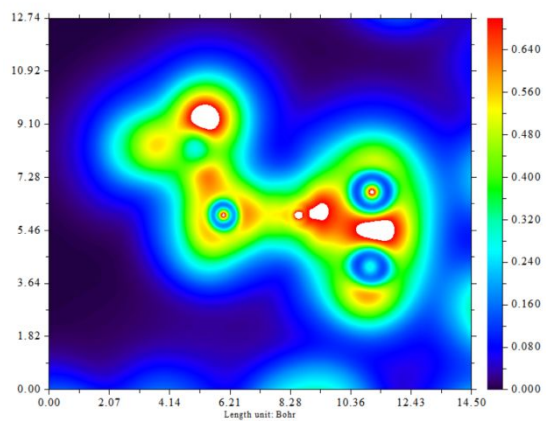

(a)

**Fig. S54** Color-filled maps of LOLs. (a) TS-ch3trans-4-CH<sub>3</sub>OH.

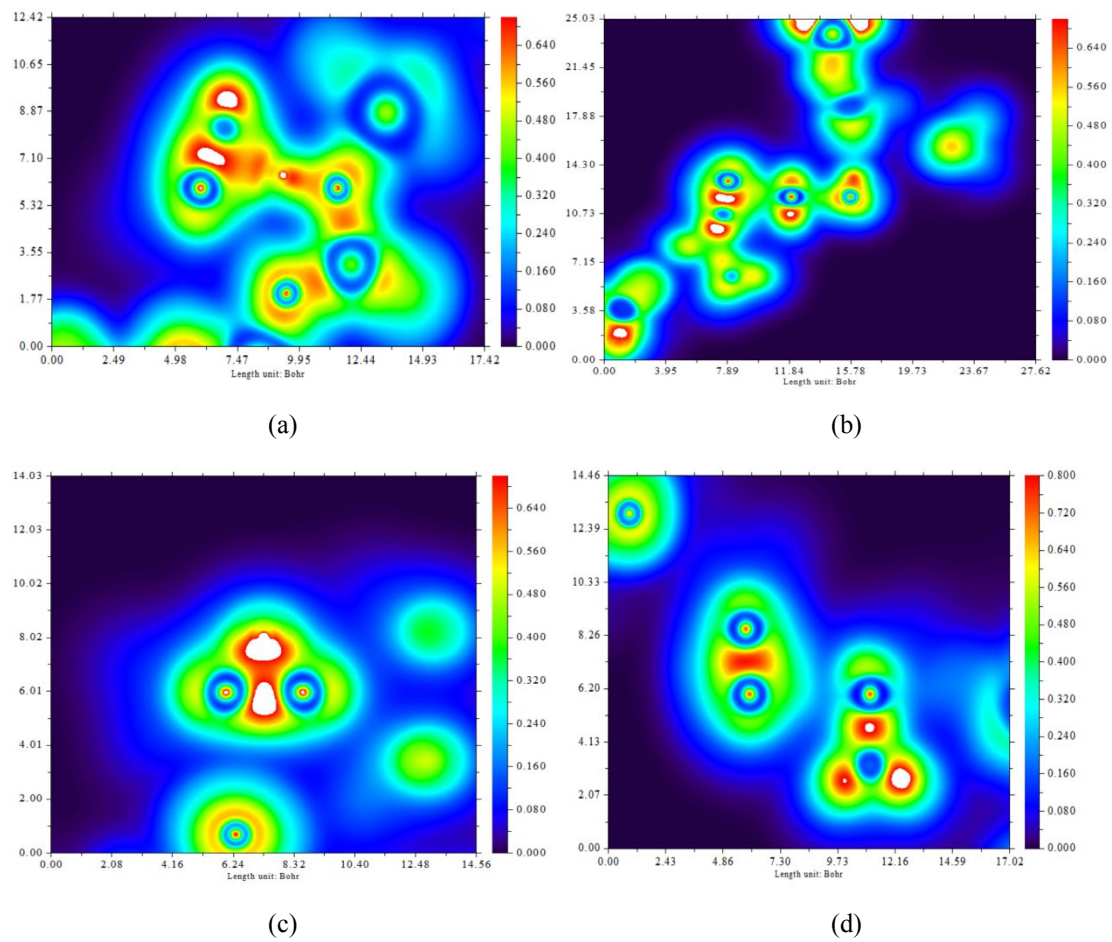

**Fig. S55** Color-filled maps of (a, b, c, d) LOLs. (a) TS-alkene-2, (b) TS-alkene-5, (c) TS-alkene-6, and (d) TS-alkene-7.



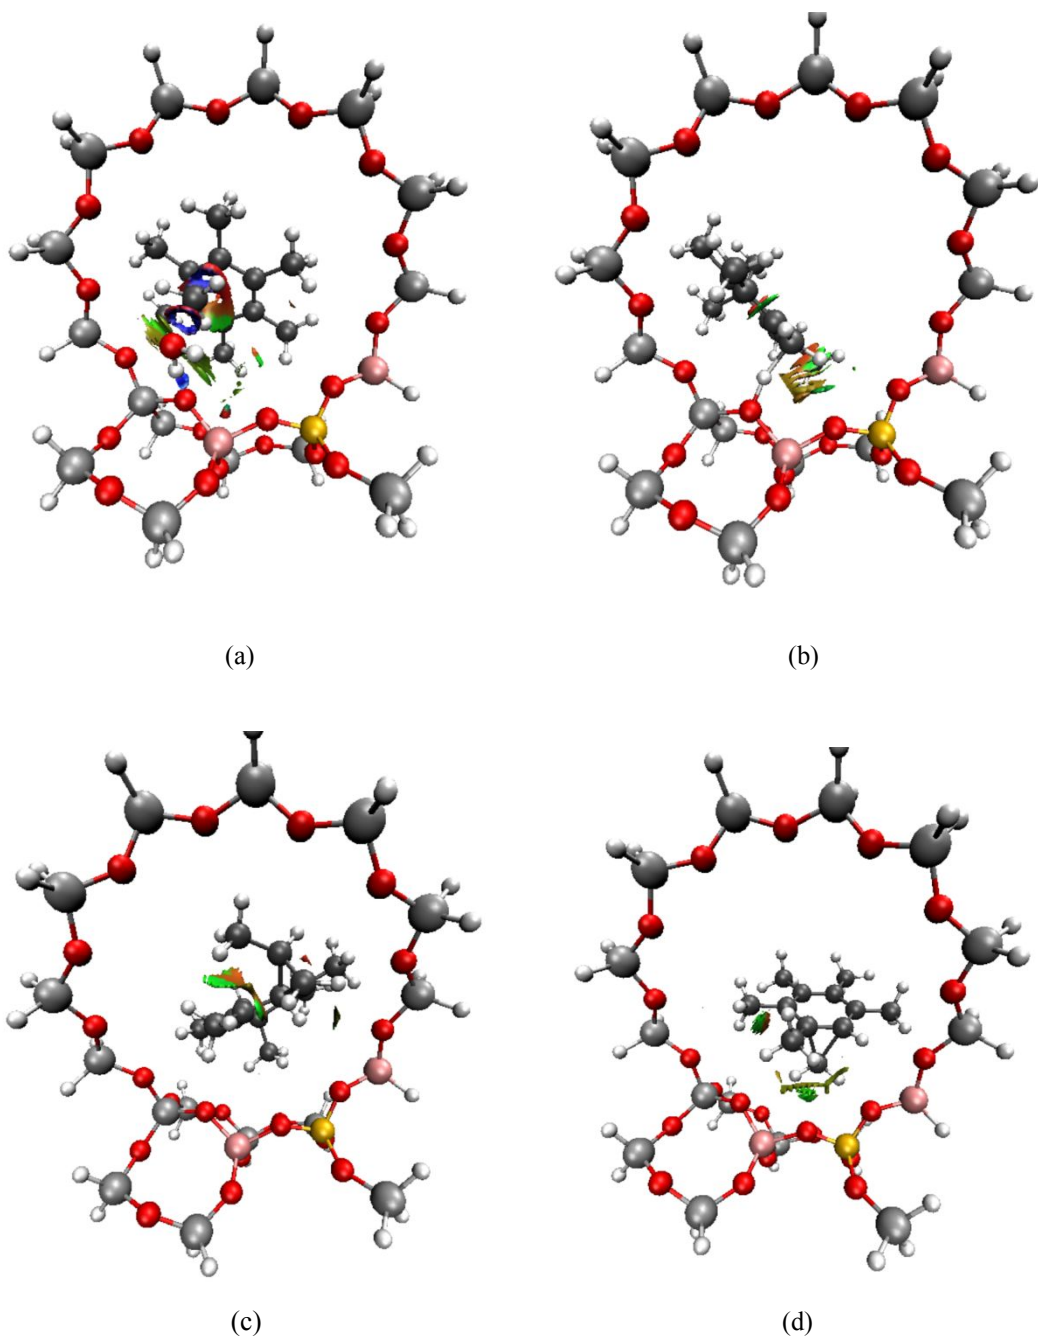

**Fig. S56** Isosurface plots of (a, b, c, d) RDGs. (a) TS-direct-1, (b) TS-direct-2, (c) TS-direct-6, and (d) TS-direct-7.

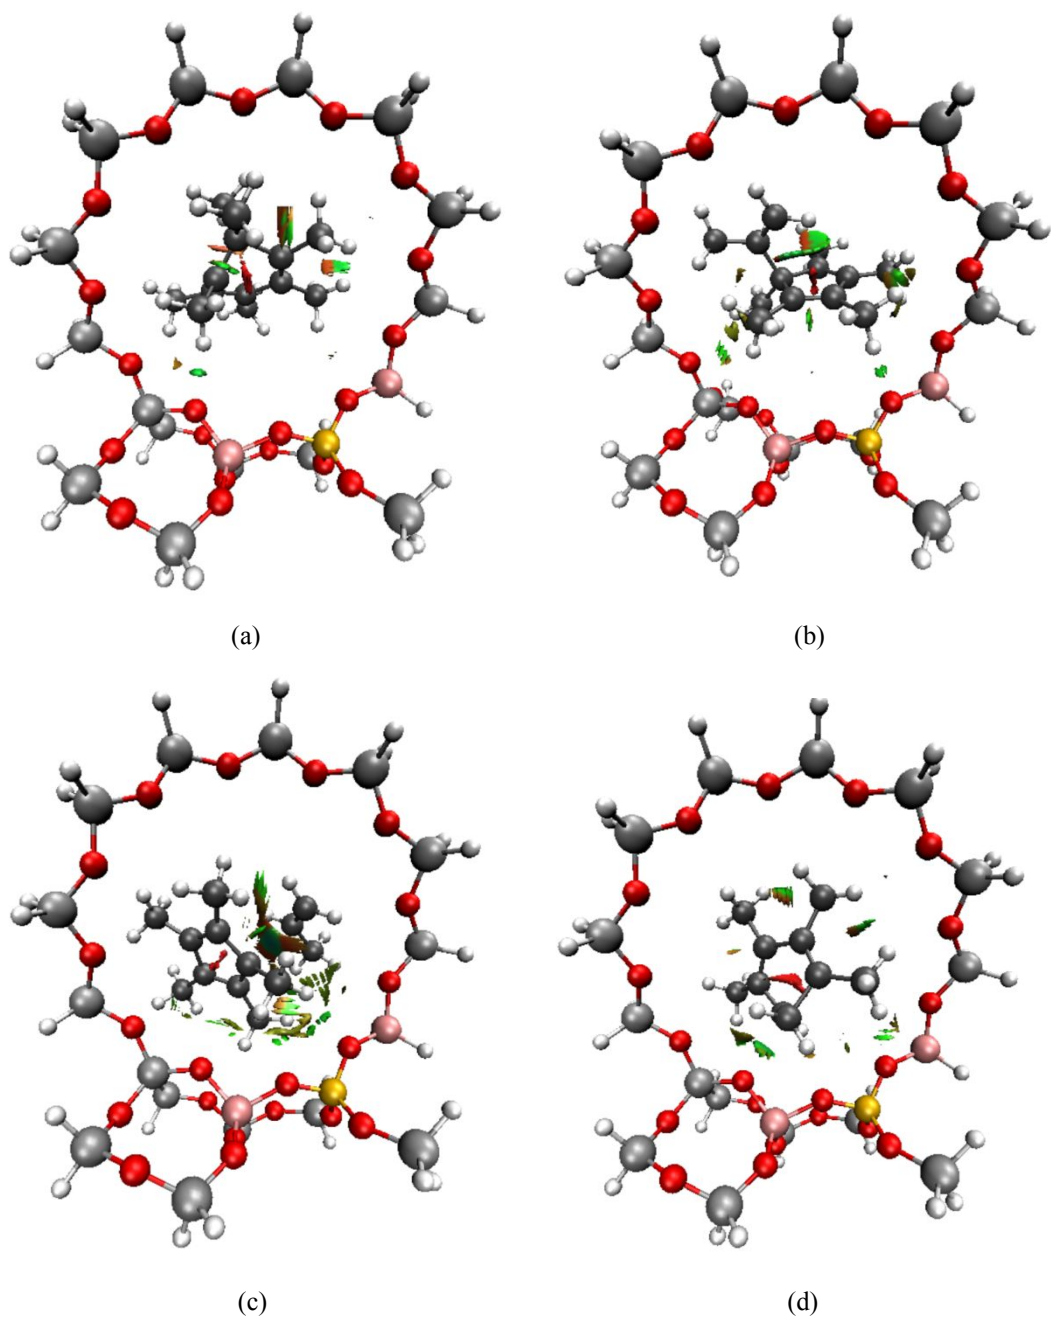

**Fig. S57** Isosurface plots of (a, b, c, d) RDGs. (a) TS-paring-1, (b) TS-paring-2, (c) TS-paring-3, and (d) TS-paring-6.

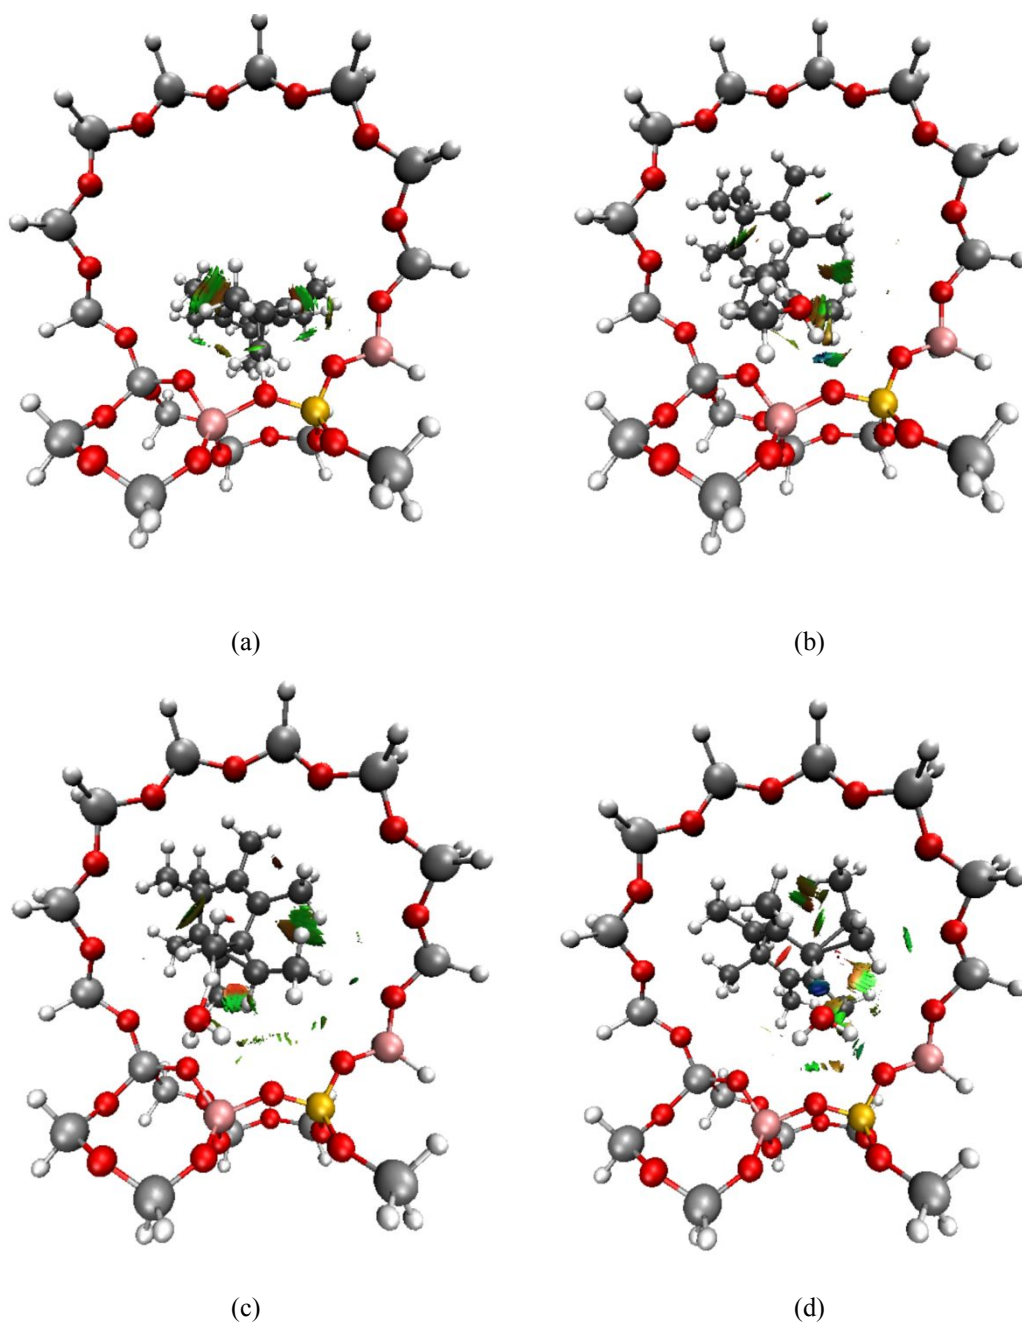

**Fig. S58** Isosurface plots of (a, b, c, d) RDGs. (a) TS-spiro-1, (b) TS-spiro-1-CH<sub>3</sub>OH, (c) TS-spiro-1-H<sub>2</sub>O, and (d) TS-spiro-2-H<sub>2</sub>O.

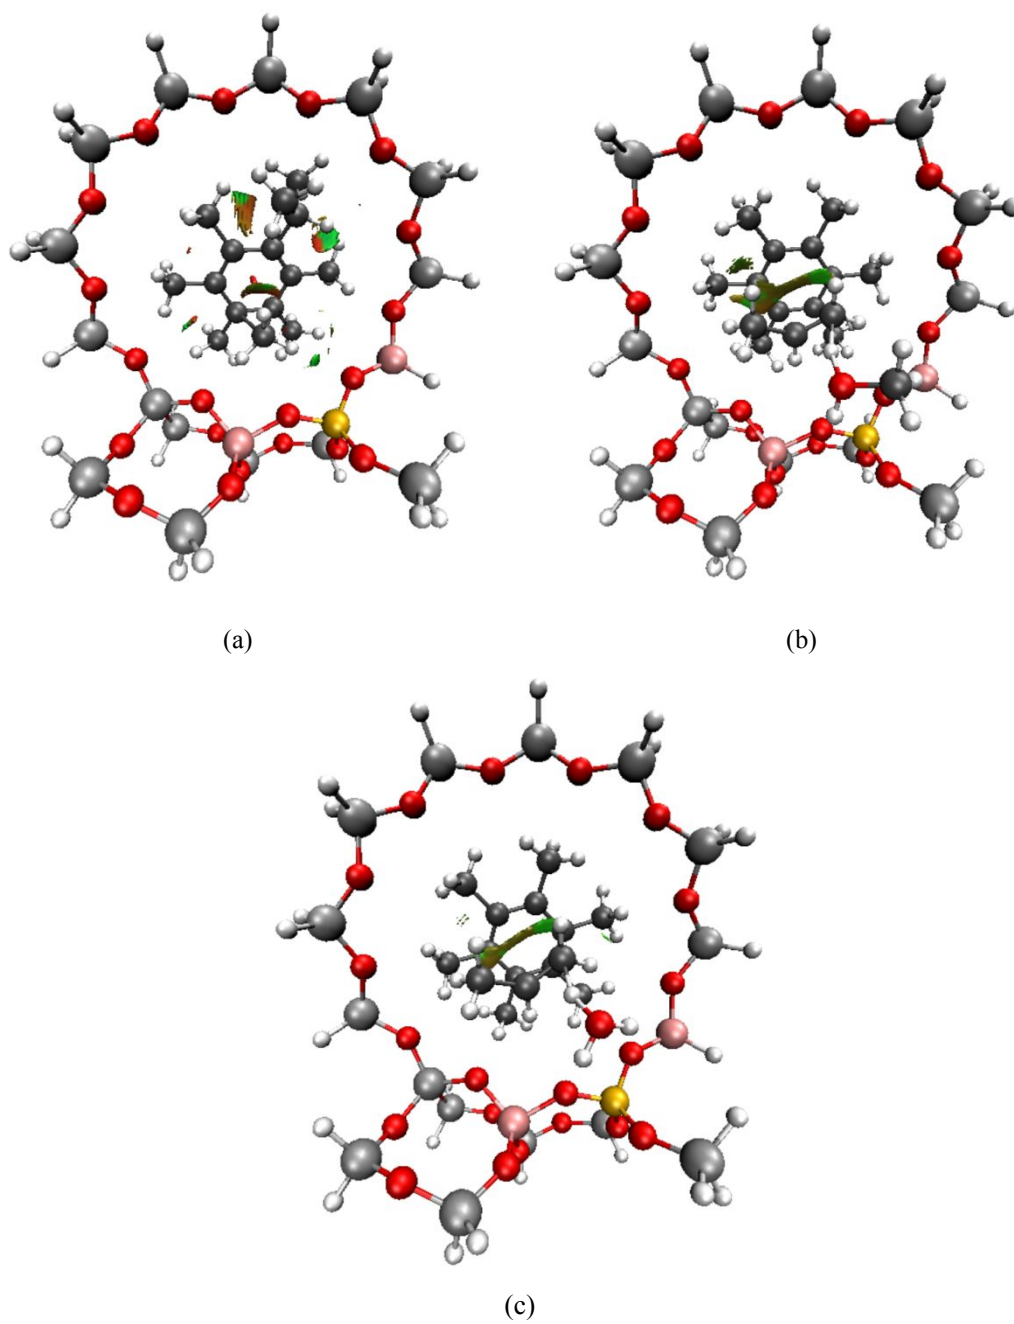

**Fig. S59** Isosurface plots of (a, b, c) RDGs. (a) TS-ch3trans-1, (b) TS-ch3trans-4-CH<sub>3</sub>OH, and (c) TS-ch3trans-4-H<sub>2</sub>O.

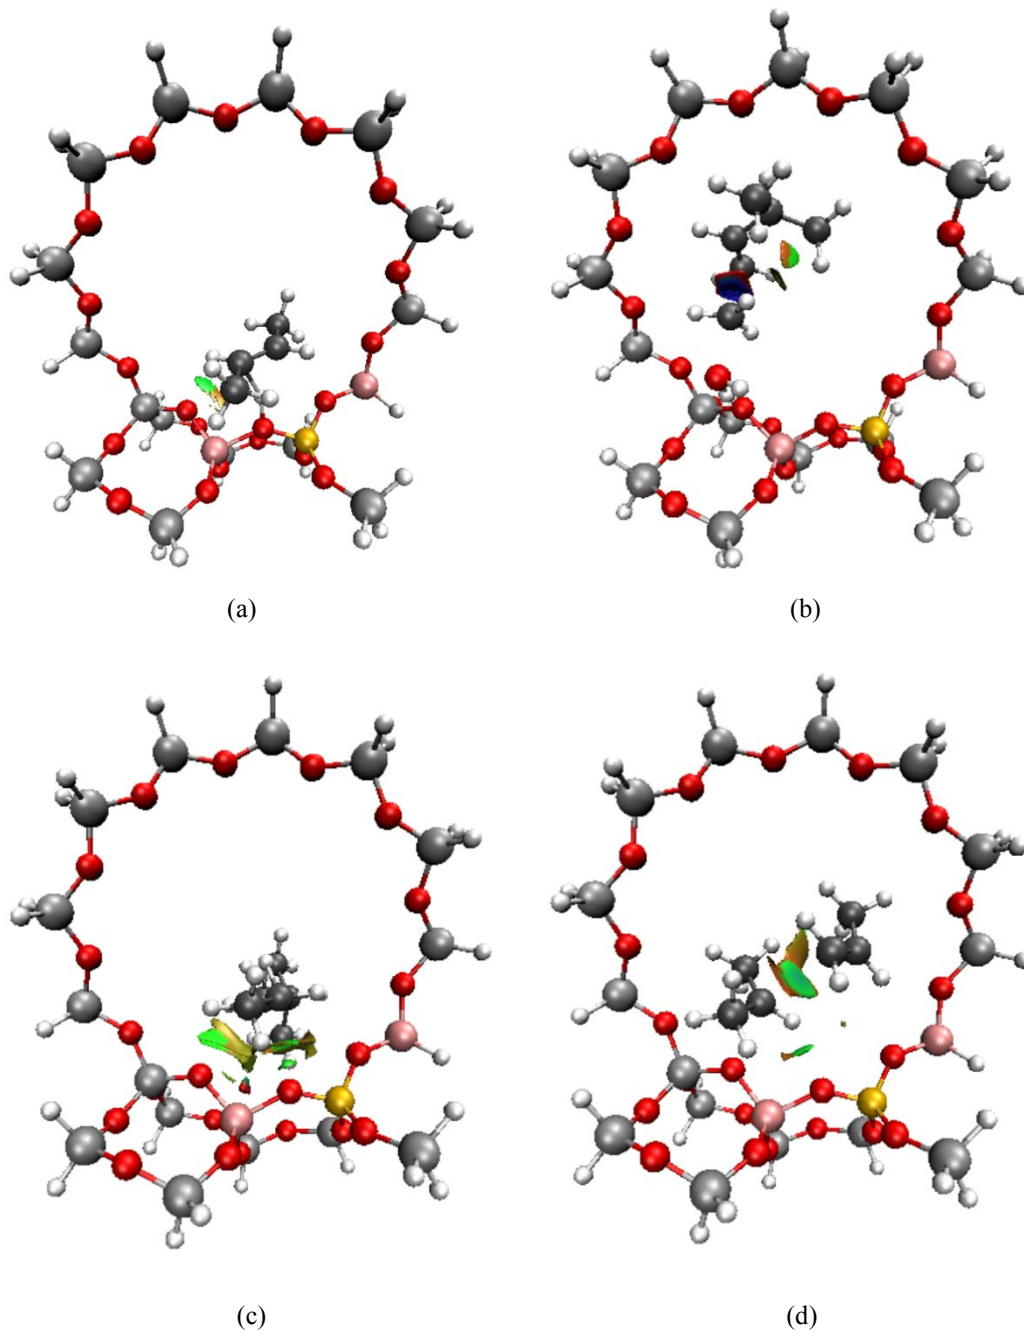

**Fig. S60** Isosurface plots of (a, b, c, d) RDGs. (a) TS-alkene-2, (b) TS-alkene-5, (c) TS-alkene-6, and (d) TS-alkene-7.

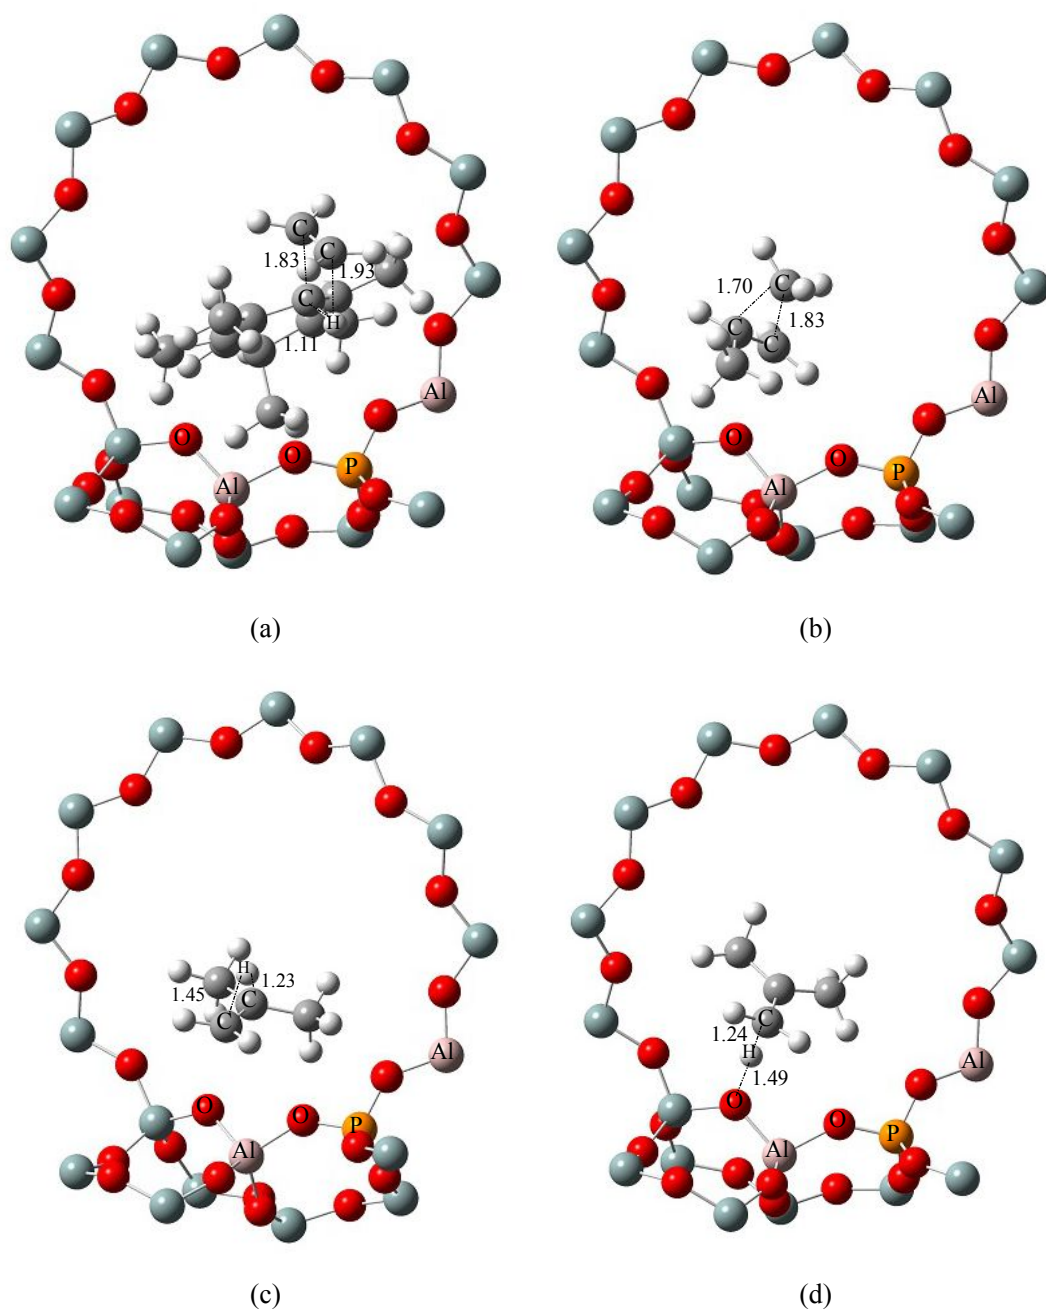

**Fig. S61** Optimized structures of (a) TS-direct-ethene, (b) TS-isobutene-1, (c) TS-isobutene-2, and (d) TS-isobutene-3.
